1 **A target capture approach for phylogenomic analyses**  
2 **at multiple evolutionary timescales in rosewoods**  
3 **(*Dalbergia* spp.) and the legume family (Fabaceae)**

4

5 Simon Crameri<sup>1</sup> | Simone Fior<sup>1</sup> | Stefan Zoller<sup>1,2</sup> | Alex Widmer<sup>1</sup>

6

7 <sup>1</sup> Institute of Integrative Biology, ETH Zurich, Zürich, Switzerland

8 <sup>2</sup> Genetic Diversity Centre (GDC), ETH Zurich, Zürich, Switzerland<sup>1</sup>

9

10 **Running title**

11 Target capture in *Dalbergia* and legumes

12

13 **Correspondence**

14 Simon Crameri, Institute of Integrative Biology, ETH Zurich, Zürich, Switzerland. Email:

15 [sfcrameri@gmail.com](mailto:sfcrameri@gmail.com)

16

17 Alex Widmer, Institute of Integrative Biology, ETH Zurich, Zürich, Switzerland. Email:

18 [alex.widmer@usys.ethz.ch](mailto:alex.widmer@usys.ethz.ch)

---

<sup>1</sup> Current address: Orniplan AG, Wiedingstrasse 78, Zürich, Switzerland.

19

20 **Funding information**

21 This work was supported by ETH Zurich and a grant from the Rübél Foundation to AW. The  
22 funders had no role in study design, data collection and analysis, or preparation of the  
23 manuscript.

24

25

## 26 **Abstract**

27 Understanding the genetic changes associated with the evolution of biological diversity is of  
28 fundamental interest to molecular ecologists. The assessment of genetic variation at hundreds  
29 or thousands of unlinked genetic loci forms a sound basis to address questions ranging from  
30 micro- to macro-evolutionary timescales, and is now possible thanks to advances in  
31 sequencing technology. Major difficulties are associated with i) the lack of genomic resources  
32 for many taxa, especially from tropical biodiversity hotspots, ii) scaling the numbers of  
33 individuals analyzed and loci sequenced, and iii) building tools for reproducible bioinformatic  
34 analyses of such datasets. To address these challenges, we developed a set of target capture  
35 probes for phylogenomic studies of the highly diverse, pantropically distributed and  
36 economically significant rosewoods (*Dalbergia* spp.), explored the performance of an  
37 overlapping probe set for target capture across the legume family (Fabaceae), and built a  
38 general-purpose bioinformatics pipeline. Phylogenomic analyses of *Dalbergia* species from  
39 Madagascar yielded highly resolved and well supported hypotheses of evolutionary  
40 relationships. Population genomic analyses identified differences between closely related  
41 species and revealed the existence of a potentially new species, suggesting that the diversity  
42 of Malagasy *Dalbergia* species has been underestimated. Analyses at the family level  
43 corroborated previous findings by the recovery of monophyletic subfamilies and many well-  
44 known clades, as well as high levels of gene tree discordance, especially near the root of the  
45 family. The new genomic and bioinformatics resources will hopefully advance systematics and  
46 ecological genetics research in legumes, and promote conservation of the highly diverse and  
47 endangered *Dalbergia* rosewoods.

48

49 **KEYWORDS**

50 *Dalbergia*, rosewood, Fabaceae, Leguminosae, target capture, phylogenomics

51

## 52 **1 | INTRODUCTION**

53 The question how biological diversity evolves is of fundamental interest in ecology and  
54 evolution, and addressing it benefits from integrative approaches (Cutter, 2013; Rissler, 2016).  
55 Investigating evolutionary processes acting at the level of populations or groups of spatially  
56 interconnected populations (metapopulations) within species typically falls within the fields  
57 of population genetics and phylogeography. By contrast, analyses of evolutionary  
58 relationships among species and patterns of diversification in higher taxonomic groups fall  
59 within the realm of phylogenetics. Though it has long been recognized that “the same  
60 ecological and evolutionary processes that cause lineage divergence can also drive speciation”  
61 (Rissler, 2016), research in these fields has traditionally relied on different conceptual  
62 approaches, analytical methods, and molecular markers, generating a false dichotomy  
63 between fields aiming to address the same underlying processes. Today, the  
64 conceptualization of common theory combined with advances in methodology leveraging on  
65 next-generation sequencing (NGS) data offer the opportunity to jointly study the processes  
66 that drive the evolution of biological diversity from micro- to macro-evolutionary timescales.

67 Target capture (Mamanova et al., 2010) provides an efficient approach to acquire  
68 molecular information across broad evolutionary timescales when genomic regions with  
69 varying level of diversity are included in the experimental design (Jones & Good, 2016). It  
70 requires the design of capture probes that target unique regions in the genome to prevent  
71 conflation of orthologs and paralogs, and are characterized by a conserved core for in-solution  
72 hybridization and more variable flanking regions expected to provide parsimony informative  
73 sites (Lemmon et al., 2012). Combined with high-throughput sequencing, this approach allows  
74 for the analysis of hundreds or thousands of orthologous loci in dozens to hundreds of

75 individuals at moderate per-sample costs, and therefore strikes a good balance between locus  
76 information content and scalability to high numbers of individuals, including museum  
77 specimens (de La Harpe et al., 2017; Brewer et al., 2019). Hence, target capture holds a great  
78 potential to bridge the divide between phylogenetics, phylogeography and population  
79 genetics (de La Harpe et al., 2017; Nicholls et al., 2015; Rissler, 2016) and has increasingly been  
80 applied at macro-evolutionary, phylogeographic and micro-evolutionary timescales in a wide  
81 range of animals (e.g., Faircloth et al., 2012; Lemmon et al., 2012; Prum et al., 2015) and plants  
82 (e.g., de La Harpe et al., 2018; Koenen et al., 2020a; Mandel et al., 2014).

83         A global probe set targeting 353 putatively single-copy protein-coding genes has  
84 recently been developed for flowering plants (Angiosperms353; Johnson et al., 2019). Recent  
85 studies in various plant families have shown that the Angiosperms353 probe set represents a  
86 cost-effective resource to resolve phylogenetic relationships at the level of plant orders (e.g.,  
87 Thomas et al., 2021), families (e.g., Siniscalchi et al., 2021), or at the infrageneric level (e.g.,  
88 Ottenlips et al., 2021). However, several comparisons revealed that micro-evolutionary  
89 relationships are often better resolved when targeting more loci using taxon-specific probe  
90 sets (e.g., Shah et al., 2021; Siniscalchi et al., 2021; Ufimov et al., 2021). The development of  
91 taxon-specific probe sets therefore remains valuable for detailed phylogenetic and population  
92 genetic analyses (Yardeni et al., 2021).

93         Beside challenges associated with the *de-novo* probe design, processing and analysis  
94 of high-throughput sequencing data often involves complex and computationally demanding  
95 calculations. Target capture data are often analyzed using the PHYLUCE (Faircloth, 2016) or  
96 HYBPIPER (Johnson et al., 2016) bioinformatic pipelines. PHYLUCE was developed for analysis  
97 of sequences flanking ultraconserved genomic elements and has mainly been used at macro-

98 evolutionary and phylogeographic timescales in animal systems, whereas HYBPIPER is  
99 optimized for datasets derived from probes designed in exons using HYB-SEQ (Weitemier et al.,  
100 2014). There is thus a need for existing tools to be expanded with pipelines that are applicable  
101 at deep to shallow evolutionary timescales (de La Harpe et al., 2017), while being independent  
102 from high-quality annotated genomes or transcriptomes.

103 *Dalbergia* L.f. (Fabaceae) is a pantropical and ecologically diverse plant genus with c.  
104 270 currently accepted species (WCVP, 2021), some of which have been described relatively  
105 recently (e.g, Adema et al., 2016; Lachenaud, 2016; Wilding et al., 2021a, 2021b). Numerous  
106 arborescent species are a source of rosewood (Bossler & Rabevohitra, 2002; Prain, 1904), a  
107 high-quality timber sought-after on the international market and cause of conservation  
108 concern (Schuurman & Lowry, 2009; Waeber et al., 2019). National and international  
109 regulations have been established, aiming at sustainable exploitation and revenues (Barrett  
110 et al., 2013; CITES, 2020), but illegal logging and trade continues (UNODC, 2016b, 2020;  
111 Vardeman & Runk, 2020). The effective implementation of regulations demands that species  
112 are reliably recognized and that extant population sizes are estimated to assess the potential  
113 threat status. Developing a comprehensive understanding of species diversity in *Dalbergia*  
114 and their evolutionary history, as well as a thorough knowledge of the ecology and distribution  
115 of many traded species, has been hampered by several factors. There is a shortage of  
116 collections and experts focusing on this taxonomically challenging genus, and current  
117 treatments heavily rely on leaves and flowers and/or fruits for identification (Bossler &  
118 Rabevohitra, 2002; de Carvalho, 1997; Lachenaud, 2016), which are rarely encountered  
119 together in the field. As a result, the taxonomy of the genus is in need of extensive revision

120 (Wilding et al., 2021a), which could be supported by phylogenomic analyses targeting the  
121 nuclear genome (Cramer, 2020).

122 Motivated by the need for genomic resources to inform a reliable taxonomy and foster  
123 conservation practice, we introduce a target capture approach for anchored phylogenomic  
124 analyses in *Dalbergia* (Dalbergia2396 set). This genus belongs to the third largest angiosperm  
125 family (Fabaceae, a.k.a. Leguminosae or legume family), which is subject to extensive research  
126 in areas such as systematics (LPWG, 2017), ecology (Sprent et al., 2017), evolution (Koenen et  
127 al., 2021), speciation and rapid radiations (Hughes & Eastwood, 2006), and contains many  
128 agricultural crops (Mousavi-Derazmahalleh et al., 2018; Zhuang et al., 2019). This motivated  
129 us to further explore the applicability of our approach for analyses across the entire legume  
130 family, which resulted in a second probe set (Fabaceae1005 set). Both probe sets represent a  
131 subset of 6,555 conserved target regions distributed across the nuclear genome, derived from  
132 a combination of divergent reference capture using five published legume genomes, and a *de*  
133 *novo* assembly of a *Dalbergia* transcriptome. We also introduce a dedicated bioinformatics  
134 pipeline named CAPTUREAL supporting the analysis of high-throughput target capture  
135 sequencing data, with special emphasis on streamlined applicability, parallelization, and  
136 graphical output for informed parameter choices. The pipeline is designed for general  
137 application to target capture datasets, modular, and therefore easily customizable. We  
138 demonstrate the application of our approach to resolve phylogenetic relationships in the  
139 economically important and conservation-relevant genus *Dalbergia*. We then explore the  
140 utility for phylogenomic analyses at much deeper timescales by analyzing target capture data  
141 of various legume subfamilies. Finally, we test the utility of this approach at a micro-



142 evolutionary scale, and assess genetic variation among individuals and populations of two  
143 closely related *Dalbergia* species from Madagascar.

144

## 145 **2 | MATERIALS AND METHODS**

### 146 **2.1 | Design of target capture probes and reference sequences**

147 We produced a transcriptome assembly of a cultivated individual of *Dalbergia*  
148 *madagascariensis* subsp. *antongilensis* Bosser & R. Rabev., based on 63 million paired-end  
149 sequencing reads generated on an Illumina® HiSeq™ 2000 platform. We performed *de novo*  
150 assembly of the transcriptome using Trinity release 2012-01-25 (Grabherr et al., 2011),  
151 resulting in 146,484 scaffolds, which were between 201 and 17,129 bp long, with a mean  
152 length of 815 bp (see Supplementary Methods). We then pairwise aligned the *Dalbergia*  
153 transcriptome with reference genomes of five legume species available in public databases to  
154 generate a set of 12,049 probes from 6,555 conserved target regions (see Supplementary  
155 Methods). This probe set was used for synthesis of hybridizing probes at myBaits® Custom  
156 Target Capture Kits (Arbor Biosciences; <https://arborbiosci.com>).

157

### 158 **2.2 | Taxon sampling for target capture probes validation**

159 We created three taxon sets with contrasting levels of evolutionary divergence, ranging from  
160 subfamilies to species to populations. The subfamily set (Table S1) included five of the six  
161 legume subfamilies, as recognized in the most recent treatment (LPWG, 2017), and comprised  
162 104 individuals (110 samples, six replicates; 99 species including three outgroups). Three  
163 species of *Polygala* Tourn. ex L. (Polygalaceae) were included as the outgroup for the  
164 subfamily set. The species set (Table S2) included members of the closely related genera

165 *Dalbergia* (at least 19 species), *Machaerium* Pers. (three species) and *Ctenodon* Baill. sensu  
166 Cardoso et al. (2020) (two species) and comprised 60 individuals (63 samples, three replicates;  
167 at least 26 species including two outgroups). Two species of *Aeschynomene* L. sensu stricto  
168 (s.str.) sensu Cardoso et al. (2020) were included as the outgroup for the species set. The  
169 population set (Table S3, Figure S4) included 51 individuals in total, 29 attributed to *D.*  
170 *monticola* Bosser & R. Rabev. from four sampling locations, and 22 attributed to *D. orientalis*  
171 Bosser & R. Rabev. from eleven sampling locations.

172

### 173 **2.3 | Library preparation, target capture and sequencing**

174 We extracted total genomic DNA from silica gel dried leaf tissue (185 extractions) or museum  
175 specimens deposited at the Paris (P) herbarium (11 extractions) using the CTAB protocol  
176 (Doyle and Doyle, 1987) or the DNeasy® Plant Mini Kit (Qiagen). We quantified DNA using the  
177 QuantiFluor® dsDNA system for a Quantus™ fluorometer (Promega) and checked DNA  
178 integrity on 1.5% agarose gels for a subset of samples. We prepared genomic DNA libraries  
179 for each sample using the NEBNext® Ultra II DNA Library Prep Kit for Illumina® (New England  
180 Biolabs), following manufacturer's instructions. We individually indexed samples to be pooled  
181 within the same sequencing lane during the PCR enrichment step using NEBNext® Multiplex  
182 Oligos for Illumina® (single-indexed with E7335 and E7500 kits, or dual-indexed with E6440  
183 kit, New England Biolabs). We performed in-solution hybridization and target enrichment  
184 using our 12,049 tiled RNA probes. We pooled up to six individually indexed libraries during  
185 the hybridization step using a stratified random assignment of libraries to hybridization  
186 reactions. Stratification aimed at optimizing the sequencing coverage across samples and  
187 consisted in avoiding pooling of close relatives of *Cajanus cajan* with more distantly related

188 samples, and of museum specimens with silica gel dried leaf material. We obtained short read  
189 data by combining sequencing runs from an Illumina® MiSeq™ (2×300 bp paired-end  
190 sequencing, 99 libraries) at the Genetic Diversity Centre (GDC) Zurich, an Illumina® HiSeq™  
191 4000 (2×150 bp paired-end sequencing, 88 libraries) at the Functional Genomics Center Zurich  
192 (FGCZ) or Fasteris SA (Plan-les-Ouates, Switzerland), and an Illumina® NovaSeq™ 6000 SP flow  
193 cell (2×150 bp paired-end sequencing, 9 libraries) at the FGCZ. We repeated DNA extraction,  
194 hybridization and target enrichment sequencing for nine individuals (replicates) to assess  
195 reproducibility. One sample (*Hassold 565*) was represented in each taxon set, nine samples  
196 were represented in both the species and population sets, and nineteen samples were  
197 represented in both the subfamily and species sets.

198

## 199 **2.4 | CAPTUREAL bioinformatics pipeline**

200 The bioinformatic pipeline CAPTUREAL was developed for this project and is accessible on  
201 Github (<https://github.com/scrameri/CaptureAl>) as a documented sequence of scripts. These  
202 include bash and R scripts (R Core Team, 2020) to manage and visualize data with APE version  
203 5.3 (Paradis & Schliep, 2018), DATA.TABLE version 1.12 (Dowle & Srinivasan, 2019), and TIDYVERSE  
204 version 1.3.0 (Wickham et al., 2019). Where appropriate, computations are carried out for  
205 multiple samples or target regions in parallel using GNU PARALLEL (Tange, 2011). The CAPTUREAL  
206 pipeline streamlines the mapping of quality-trimmed reads to target regions, the exclusion of  
207 loci targeting multi-copy genes and taxa with insufficient data coverage, and the alignment of  
208 orthologous loci for downstream phylogenetic analyses. At various critical steps, the pipeline  
209 outputs summary statistics and graphs that inform the user on the effects of specific filtering  
210 parameters, allowing for informed parameter choices.

211           The pipeline is divided into seven steps to process quality-filtered reads. Steps 1 to 5  
212 are always required, and 1) map the sequencing reads to target regions, 2) assemble mapped  
213 reads separately for each target region, 3) identify the most-likely orthologous contigs, 4)  
214 identify taxa and target regions with high capture sensitivity and specificity, and 5) create  
215 trimmed alignments of the kept taxa and target regions. Steps 6 and 7 are optional, and 6)  
216 combine physically neighboring and overlapping alignments to 7) generate longer and more  
217 representative reference sequences as starting points for reiteration of steps 1 to 5. Such  
218 reiteration can improve mapping success, and mitigates potential biases arising from the  
219 reference sequences used (Hahn et al., 2013).

220           In our analyses, we executed the pipeline separately and iteratively for different taxon  
221 sets. We first applied steps 1 to 5 to twelve representative samples each from the subfamily  
222 and species sets, followed by steps 6 and 7 to generate longer and taxon-specific reference  
223 sequences for target regions that can each be efficiently recovered in these taxon sets, and  
224 then reiterated steps 1 to 5 for all samples of the subfamily and species sets using the new  
225 reference sequences and more stringent target region filtering parameters (see Tables S1–S3  
226 and Supplementary Methods for details). We also performed steps 6 and 7 after the second  
227 iteration of the species set analysis to produce reference sequences for analysis of the  
228 population set. Bioinformatic analyses were carried out on a multi-core LINUX server (GDC  
229 Zurich) or on the EULER scientific compute cluster (ETH Zurich). The sequence of executed  
230 commands and the chosen parameters are provided in Supplementary Methods.

231

232 2.4.1 | Step 1: Read mapping

233 Quality-filtered reads of each sample are mapped against the reference sequences (one  
234 sequence per target region) using the BWA-MEM algorithm (Li, 2013). The minimum alignment  
235 score and mapping quality can be adjusted as needed. Coverage statistics are computed using  
236 SAMTOOLS (Li & Durbin, 2009) and BEDTOOLS (Quinlan & Hall, 2010), and target regions are  
237 visually filtered for adequate coverage across samples using *filter.visual.coverages.R*, which  
238 allows to apply filtering thresholds that are informed by visualizations of coverage statistics  
239 (see Supplementary Methods). The main output of step 1 are BAM files a list of retained target  
240 regions.

241

#### 242 2.4.2 | Step 2: Sequence assembly

243 Read pairs are extracted from quality-filtered reads when at least one read mapped to any of  
244 the retained target regions with the specified minimum mapping quality. Extracted reads are  
245 assembled separately for each sample and region using DIPSPADES (Safonova et al., 2015)  
246 based on haplocontigs generated by SPADES (Bankevich et al., 2012, see Supplementary  
247 Methods). The main output of step 2 are consensus contiguous sequences (contigs hereafter)  
248 for each sample and each target region.

249

#### 250 2.4.3 | Step 3: Orthology assessment

251 Sequence assembly may yield multiple contigs per sample for some target regions, e.g., due  
252 to capture of several fragments of the same genomic region (e.g., in degraded museum  
253 specimens), or due to unspecific capture of paralogs (Johnson et al., 2016). The most likely  
254 orthologous contig(s) of each sample in each target region are determined using an exhaustive  
255 Smith-Waterman alignment (Smith & Waterman, 1981) between all contigs and the reference

256 sequences using EXONERATE (Slater & Birney, 2005). The best-matching contig is defined based  
257 on the EXONERATE alignment statistics as the most likely orthologous contig for each sample  
258 and target region, and further contigs that did not overlap with one another or the best-  
259 matching contig, but aligned with a sufficient alignment score to other parts of the target  
260 region are retained. These contigs likely represent fragments of the same region, and can  
261 therefore be combined with the best-matching contig to form a contiguous sequence  
262 (orthologous contig hereafter, see Supplementary Methods). The main output of step 3 is a  
263 single-sequence FASTA file with the putative orthologous contig for each sample and each  
264 target region.

265

#### 266 2.4.4 | Step 4: Sample and region filtering

267 Successful target capture depends on whether sequence data can be collected for a high  
268 proportion of target regions (capture sensitivity, Jones & Good, 2016) in a high proportion of  
269 focal taxa, and whether the captured sequences are orthologs of the target regions (capture  
270 specificity). Target regions are visually filtered for high capture sensitivity and specificity  
271 across focal taxa using *filter.visual.assemblies.R*, which allows to apply filtering thresholds that  
272 are informed by visualizations of EXONERATE alignment statistics generated in step 3. These  
273 thresholds can be set globally to remove generally poorly sequenced samples or target  
274 regions, but they can also be set as the minimum fraction of samples required to pass a  
275 specified filtering threshold in order for a target region to be retained. Taxon groups can be  
276 defined, in which case the required capture sensitivity and specificity parameters need to be  
277 met in all considered taxon groups separately, thus preventing target regions from being

278 poorly represented in rare taxon groups (see Supplementary Methods). The main output of  
279 step 4 is a list of samples and a list of target regions to keep.

280 In our analyses, we defined the four subfamilies represented by multiple taxa as taxon  
281 groups in the subfamily set. In the species set we defined four taxon groups based on our  
282 preliminary phylogenetic results and phylogenetic relationships inferred by Hassold et al.  
283 (2016). These were subgroup (SG) 1 (species with large flowers and paniculate inflorescences),  
284 SG2 (species with large flowers and racemose inflorescences), SG3 (species with small flowers  
285 from East Madagascar), and SG4 (species with small flowers from West and North  
286 Madagascar).

287

#### 288 2.4.5 | Step 5: Target region alignment and alignment trimming

289 A multi-sequence FASTA file is generated for all retained target regions, containing the  
290 respective orthologous contigs of all retained samples. Sequences are then aligned using MAFFT  
291 (Katoh & Standley, 2013), allowing for different alignment options. Alignments are trimmed  
292 at both ends until an alignment site shows nucleotides across a specified minimum fraction of  
293 aligned sequences, along with a specified maximum nucleotide diversity (i.e., the mean  
294 number of base differences between all sequence pairs). In addition, internal trimming is  
295 performed by only keeping sites with nucleotides in a specified minimum fraction of aligned  
296 sequences. Potential mis-assemblies or mis-alignments at contig ends are further resolved  
297 using a sliding window approach that identifies and masks sequences with large deviations  
298 from the alignment consensus (see Supplementary Methods). The main output of step 5 are  
299 potentially overlapping trimmed alignments for each kept target region.

300

#### 301 2.4.6 | Step 6: Merging of overlapping alignments

302 Shorter but physically close target regions facilitate sequence assembly in lower-quality  
303 samples but can lead to overlaps in trimmed alignments of neighboring target regions. Such  
304 overlaps can be identified by aligning consensus sequences of target region alignments.  
305 Specifically, consensus sequences are generated by calling IUPAC ambiguity codes if a given  
306 minor allele frequency threshold is reached, or a gap if a given base frequency threshold is not  
307 reached. Local alignments between different consensus sequences are identified using BLAST+  
308 version 2.7.1 (Camacho et al., 2009), and filtered for non-reciprocal hits between alignment  
309 ends of target regions located on the same linkage group. Orthologous contigs that are part  
310 of different, overlapping alignments are then aligned using MAFFT. The resulting merged  
311 alignments are then collapsed to represent different orthologous contigs of the same  
312 individual as a single sequence, a process that can be visually inspected if needed. Trimming  
313 is then applied as in step 5, and sets of two to several consecutively overlapping alignments  
314 are then each replaced by a single merged alignment if merging was successful (see  
315 Supplementary Methods). The main output of step 6 are non-overlapping trimmed alignments  
316 for each kept target region.

317

#### 318 2.4.7 | Step 7: Generation of representative reference sequences

319 To mitigate potential biases arising from the reference sequences used, a new set of target  
320 region reference sequences can be generated based on the target region alignments  
321 generated in the two previous steps. For this purpose, a consensus sequence is generated for  
322 each alignment as in step 6, but separate consensus sequences can be generated for different  
323 specified taxon groups (see step 4). These sets of taxon group specific consensus sequences



324 are then aligned, and representative consensus sequences are generated as in step 6 (see  
325 Supplementary Methods). These taxon-specific reference sequences are the main output of  
326 step 7 and can be used to refine mapping, assembly and alignment by reiterating steps 1 to 5.

327

#### 328 2.4.8 | Alignment assessment and filtering

329 We characterized all non-overlapping trimmed alignments for the number of gaps, gap ratio  
330 (i.e, the fraction of non-nucleotides in the alignment), total nucleotide diversity, average  
331 nucleotide diversity per site, and alignment length, as well as the number and proportion of  
332 segregating and parsimony informative sites. We then visually filtered alignments using  
333 *filter.visual.alignments.R*, which allows to apply filtering thresholds that are informed by  
334 visualizations of alignment statistics (see Supplementary Methods). We used the filtered  
335 alignments after the second iteration of step 6 for phylogenetic analyses.

336

#### 337 2.5 | Phylogenetic analyses

338 We performed phylogenetic analyses with both the subfamily and species sets, using a  
339 supermatrix (concatenation) approach and a gene tree summary approach. For the  
340 supermatrix approach, we ran maximum likelihood searches on the concatenated alignments  
341 using RAxML version 8.2.11 (Stamatakis, 2014) with rapid bootstrap analysis and search for  
342 the best-scoring tree in the same run (-f a option), 100 bootstrap replicates, and the GTRCAT  
343 approximation of rate heterogeneity (see Supplementary Methods). For the gene tree  
344 summary approach, we ran RAxML jobs separately for each alignment using the same settings  
345 as for the supermatrix approach to generate gene trees. Following Zhang et al. (2018), we  
346 collapsed branches in gene trees if they had bootstrap support values below 10 using NEWICK

347 utilities (Junier & Zdobnov, 2010), and we performed species tree analyses with ASTRAL-III  
348 version 5.6.3 (Mirarab et al., 2014; Zhang et al., 2018) and standard parameters, except for  
349 full branch annotation (see Supplementary Methods). For the subfamily set, we additionally  
350 evaluated the quartet support for fifteen different subfamily topologies (i.e., all possible  
351 topologies with Caesalpinioideae, Dialioideae, Papilionoideae and (Cercidoideae,  
352 Detarioideae) as ingroups; Figure S2), using the tree scoring option in ASTRAL-III and a file with  
353 the assignment of taxa to subfamilies or the outgroup. All phylogenetic trees were displayed  
354 using GGTREE version 2.0.2 (Yu et al., 2016).

355

## 356 **2.6 | Population genetic analyses**

357 We carried out population genetic analyses for the population dataset. We mapped quality-  
358 filtered reads against the target region reference sequences that were representative of the  
359 species set after the second iteration using BWA-MEM. We verified efficient recovery of target  
360 regions by plotting heatmaps of coverage statistics, removed PCR duplicates using PICARD TOOLS  
361 version 2.21.3 (Broad Institute, 2019), and capped excessive coverage to 500 using  
362 *biostar154220.jar* (Lindenbaum, 2015). We then called variants using FREEBAYES version 1.1.0-  
363 3-g961e5f3 (Garrison & Marth, 2012) and standard parameters, except for a minimum  
364 alternate fraction of 0.05, a minimum repeat entropy of 1, and evaluation of only the four best  
365 alleles. Variants were filtered using VCFTOOLS version 0.1.15 (Danecek et al., 2011) and VCFLIB  
366 version 1.0.1 (Garrison, 2012), which was also used to decompose complex variants (see  
367 Supplementary Methods). We then used VCFR version 1.10.0 (Knaus & Grünwald, 2017) and  
368 ADEGENET version 2.1.1 (Jombart, 2008; Jombart & Ahmed, 2011) to generate *genind* and  
369 *genlight* objects that represented the SNP allele table with associated metadata such as

370 individual missingness, species identification, and sampling location. We used the SNP subset  
371 with zero missingness to conduct principal component analysis (PCA) based on the centered  
372 covariance matrix, as well as to calculate a neighbor-joining (NJ) tree (Saitou & Nei, 1987) on  
373 Nei's genetic distances, as implemented in POPPR version 2.8.1 (Kamvar et al., 2014). We also  
374 used the allele table to create a SNP subset for population clustering analysis using STRUCTURE  
375 version 2.3.4 (Pritchard et al., 2000). Specifically, we kept SNPs with genotype data in at least  
376 95% of individuals, and we randomly sampled up to three SNPs per target region for linkage  
377 disequilibrium pruning and computational ease. STRUCTURE analyses were performed for one  
378 to ten demes ( $K$ ), using 110,000 iterations, including a burn-in period of 10,000 iterations, with  
379 ten replicates per simulation (see Supplementary Methods). Replicate STRUCTURE results were  
380 aligned and visualized using CLUMPAK (Kopelman et al., 2015) and default settings.

381

## 382 **3 | RESULTS**

### 383 **3.1 | Two probe sets for target capture across legumes and *Dalbergia***

384 We obtained 0.13 to 13.76 (median: 1.56) million raw read pairs per sample, of which we  
385 retained 86.55% to 99.34% (median: 93.82%) after quality trimming (Tables S1 – S3). In the  
386 first iteration applied to twelve representative samples, reads mapped to 6,519 or 6,287 of  
387 the 6,555 initial target regions in the subfamily or species set, respectively (step 1). Of these  
388 we retained 3,436 or 4,908 target regions, which showed adequate coverage across taxon  
389 groups. After assembly (step 2) and orthology assessment (step 3), 2,710 or 4,181 target  
390 regions passed the region specificity and sensitivity filters of lower stringency (step 4).  
391 Following alignment and trimming (step 5), overlapping portions in 207 or 377 regions were  
392 successfully merged, resulting in 2,468 or 3,736 non-overlapping trimmed alignments (step 6).

393 Longer and more representative consensus sequences were generated from these target  
394 regions (step 7) and used as references for mapping quality-trimmed reads of the complete  
395 taxon sets (step 1, see Tables S1 and S2). We retained 1,917 or 3,418 target regions with  
396 adequate coverage (Figures S5 and S6), of which 1,020 or 2,407 passed the specificity and  
397 sensitivity filters of higher stringency (step 4) after assembly. Merging of overlapping  
398 alignments in 15 or 11 regions yielded 1,005 (subfamily set) or 2,396 (species set) distinct  
399 alignments (step 5), of which 666 represented the same regions in both sets. The  
400 corresponding Fabaceae1005 and Dalbergia2396 probe sets, along with refined taxon-specific  
401 reference sequences are deposited on Dryad. Corresponding gene annotations in the *Cajanus*  
402 *cajan* genome are given in Tables S4 and S5. For phylogenetic analyses, we excluded 19 or 7  
403 alignments with a gap ratio above 0.35 or 0.3 or a nucleotide diversity above 0.35 or 0.15,  
404 leaving 986 (subfamily set) or 2,389 (species set) alignments.

405         Quality-trimmed reads mapped to all 2,396 target regions in the population set (step  
406 1) using reference sequences that were representative of the species set after the second  
407 iteration for mapping (Figure S7). Variant calling resulted in 203,916 raw variants and  
408 116,500 filtered SNPs after decomposing complex variants, of which 60,204 (51.68%) were bi-  
409 allelic with no missing data and were used for PCA and NJ tree reconstruction. Random  
410 sampling of up to three SNPs per target region resulted in a subset of 5,042 SNPs for STRUCTURE  
411 analyses.

412

### 413 **3.2 | Phylogenomic analyses across legumes**

414 Phylogenetic analysis of 986 alignments recovered each of the five sampled subfamilies as  
415 monophyletic, and many well-established clades and relationships received  $\geq 95\%$  support

416 using both the gene tree summary method ASTRAL-III (Figure 1) and the supermatrix method  
417 (Figure S1). These included the subfamilies Cercidoideae and Detarioideae found to be sister  
418 taxa, the mimosoid clade within the recently re-circumscribed subfamily Caesalpinioideae  
419 (LPWG, 2017), as well as the Angylocalyceae-Dipterygeae-Amburaneae (ADA, Cardoso et al.,  
420 2012), Cladrastis (Wojciechowski, 2013) and Meso-Papilionoideae (Wojciechowski, 2013)  
421 clades within Papilionoideae. We also recovered the Sophoreae and Genisteeae clades  
422 (Cardoso et al., 2013) within Genistoids sensu lato (s.l.) (Cardoso et al., 2012; Wojciechowski  
423 et al., 2004). Within the Dalbergioids s.l. (Wojciechowski et al., 2004), we recovered the  
424 Amorpheae clade (McMahon & Hufford, 2004) as sister to the rest of the group, which  
425 includes the Dalbergioids s.str. clade (Lavin et al., 2001), containing the *Adesmia*, *Pterocarpus*  
426 and *Dalbergia* subclades (Lavin et al., 2001), respectively. *Ctenodon brasilianus* (Poir.)  
427 D.B.O.S.Cardoso, P.L.R.Moraes & H.C.Lima and *C. nicaraguensis* (Oerst.) A.Delgado were  
428 found to be more closely related to *Machaerium* than to *Aeschynomene*. Within the Non-  
429 Protein-Amino-Acid-Accumulating (NPAAA) clade (Cardoso et al., 2012; Wojciechowski et al.,  
430 2004), we recovered the Millettoid s.l. clade (Wojciechowski et al., 2004), containing the  
431 genera *Indigofera* and *Millettia*, and the Phaseoleae s.l. (Vatanparast et al., 2018), as well as  
432 the Hologalegina (Wojciechowski, 2013) clade, including the Robinoids and the inverted-  
433 repeat-lacking clade (IRLC, Wojciechowski et al., 2004).

434 Other relationships among subfamilies remained unresolved using both phylogenetic  
435 methods (Figure 1, Figure S1). In particular, a clade comprising Caesalpinioideae,  
436 Cercidoideae, Detarioideae and Dialioideae as sister group to Papilionoideae was not  
437 supported in the supermatrix tree, and was recovered in only 47% of quartet trees. We  
438 evaluated quartet scores (i.e., the fraction of induced quartet trees) of fourteen further

439 topologies for relationships among sampled subfamilies (Figure S2) using the tree scoring  
440 option in ASTRAL-III in combination with a file that mapped taxa to subfamilies or to the  
441 outgroup. The subfamily topology presented in Figure 1 showed the highest normalized  
442 quartet score (38.40%). Two alternative topologies received a similar normalized quartet  
443 score of 38.36% (Figure S2) and involved a clade composed of Caesalpinioideae and  
444 Papilionoideae. Further contentious relationships between major groups concerned the three  
445 clades within Meso-Papilionoideae, where the clade formed by Dalbergioids s.l. and  
446 Genistoids s.l. was recovered only in 36% of quartet trees, and in relationships within  
447 Caesalpinioideae, Detarioideae, and Genisteeae. All except one genus with multiple sampled  
448 accessions were recovered as monophyletic, the exception being *Cytisus*, which was  
449 paraphyletic with respect to *Lembotropis nigricans*. Pairs of replicates each grouped together  
450 (Figure 1, Figure S1).

451

### 452 **3.3 | Phylogenomic analyses in *Dalbergia***

453 Phylogenetic analysis of 2,389 alignments recovered samples of *Dalbergia* as monophyletic  
454 with  $\geq 95\%$  support using both ASTRAL-III (Figure 2) and the supermatrix method (Figure S3).  
455 Within *Dalbergia*, we recovered two large and exclusively Malagasy clades, which we name  
456 Madagascar Supergroup I and II. All Malagasy species represented by multiple accessions were  
457 recovered as highly supported clades, with the exception of *D. normandii*. Four non-Malagasy  
458 *Dalbergia* specimens and *D. bracteolata* Baker were each found to represent separate  
459 lineages.

460         Within Supergroup I, one clade comprised samples of *Dalbergia chapelieri* s.l., while  
461 the remaining samples belonged to a sister group containing three monophyletic species and

462 a basal and paraphyletic *D. normandii*. Within Supergroup II, two clades contained species  
463 distributed in the humid east of Madagascar, while the third contained species distributed in  
464 the seasonally dry west and north of the island. Within *D. chapelieri* s.l. and *D. monticola*,  
465 which were each represented by six individuals, we observed geographic structure, with  
466 specimens from northeast and southeast Madagascar forming sister groups. Pairs of replicates  
467 each grouped together (Figure 2, Figure S3).

468

### 469 **3.4 | Population genomic analyses**

470 Principal component analysis revealed three distinct clusters of individuals along principal  
471 component (PC) 1 (explaining 27.58% of the total variation) and PC 2 (11.26%; Figure 3).  
472 Individuals of *D. orientalis* separated along PC1, while individuals originally attributed to *D.*  
473 *monticola* formed two distinct groups mainly along PC2. The unexpected smaller cluster (in  
474 purple) comprised samples from a single broad sampling location in north-eastern  
475 Madagascar (location 5, see Figure S4 and Table S3) where both *D. monticola* and *D. orientalis*  
476 were also collected. The same three clusters were also recovered in STRUCTURE analyses (Figure  
477 S8), where biologically meaningful clustering solutions were found for  $K = 2$  (separating *D.*  
478 *orientalis* from the rest) and  $K = 3$  (further separating the unexpected smaller cluster; Figure  
479 S9). Within *D. orientalis* and the larger cluster of presumed *D. monticola*, the NJ tree reflects  
480 isolation by distance at a broad geographical scale, separating specimens from north-eastern  
481 (locations 1 to 6), central-eastern (locations 7 and 8) and south-eastern Madagascar (locations  
482 9 to 13; Figure 3). A similar geographic pattern was recovered by STRUCTURE assuming  $K = 5$   
483 (Figure S8), although that clustering solution received much lower support (Figure S9).  
484 Clustering solutions assuming higher  $K$  did not recover additional meaningful structure.  $K = 7$

485 showed an unrealistic probability by  $K$  of 1 (Figure S9B), which may be related to the presence  
486 of ‘ghost clusters’ with near-zero admixture proportions.

487

## 488 **4 | DISCUSSION**

489 Understanding the diversity and diversification of species and evolutionary lineages requires  
490 an integrative approach that links studies of micro-evolutionary processes to analyses of  
491 macro-evolutionary relationships (de La Harpe et al., 2017). Genetic data form a preferable  
492 source of information for investigations across broad evolutionary scales, as a large number  
493 of loci distributed across the nuclear genome can represent the spectrum of evolutionary  
494 rates at different scales of sample divergence. The present study introduces two overlapping  
495 sets of target capture probes for phylogenomic studies at micro- to macro-evolutionary  
496 timescales in rosewoods (*Dalbergia*2396 set) and across the legume family (Fabaceae1005  
497 set), together with the flexible and modular bioinformatic pipeline CAPTUREAL, which  
498 streamlines the processing of sequencing reads for phylogenomic and population genomic  
499 analyses while visually informing users on the effect of critical parameter choices. We  
500 demonstrated the utility of individual assemblies per target region to produce alignments of  
501 hundreds of loci suitable for concatenation and multispecies coalescent approaches, which  
502 confirmed phylogenomic conflicts at the root of the legume family, and provided an  
503 unprecedented resolution of evolutionary relationships among lineages and species of the  
504 taxonomically complex genus *Dalbergia*. Remapping of sequencing reads further made it  
505 possible to identify thousands of informative sites amenable to population genomic analyses,  
506 which revealed the existence of a potentially new cryptic *Dalbergia* species. Together, these  
507 results illustrate that our newly developed probe sets are efficient tools for studies of species



508 diversity and diversification in rosewoods (*Dalbergia* spp.) and more broadly in the  
509 economically important and highly diverse legume family.

510

#### 511 **4.1 | Target capture probes**

512 The target capture probes presented here are part of a growing collection of genomic  
513 resources for legume phylogenomics. Other probe sets for target capture in legumes have  
514 been developed, focusing on different groups within the family. Our probes can be compared  
515 to existing sets designed or validated at the level of legume species (Peng et al., 2017), genera  
516 (e.g., de Sousa et al., 2014; Nicholls et al., 2015; Shavvon et al., 2017), or subfamilies (Koenen  
517 et al., 2020a; Vatanparast et al., 2018) and across angiosperms (Johnson et al, 2019) to identify  
518 overlaps in target regions for legume phylogenomics. For example, it would be interesting to  
519 compare our probes with those of Vatanparast et al. (2018), who identified 423 target regions  
520 based on 30 transcriptomes, of which 27 were sampled from the NPAAA clade, one from  
521 Genistoids, and one each of the Caesalpinioideae and Cercidoideae subfamilies, limiting the  
522 probe set validation to 25 species of the NPAAA clade. Capture of additional, less conserved  
523 target regions across the legume family could be achieved by designing multiple probes for  
524 hybridization in the same target region in different legume groups, as applied for studies  
525 across angiosperms (Johnson et al., 2019). Such a probe design could profit from existing  
526 legume probe sets but should rely on a stringent selection of targets that accounts for paralogs  
527 (Vatanparast et al., 2018), which originated as a consequence of multiple whole-genome  
528 duplication events in legumes (Egan & Vatanparast, 2019; Koenen et al., 2021).

529 In this study, we enriched DNA libraries from three taxon sets spanning micro-  
530 evolutionary (populations) to macro-evolutionary (family) timescales, using a single set of

531 12,049 RNA probes targeting 6,555 genomic regions conserved across five Meso-  
532 Papilionoideae genomes and a *Dalbergia* transcriptome. We then identified 2,396 and 1,005  
533 target regions with high capture specificity and sensitivity within the species-rich genus  
534 *Dalbergia* (Dalbergia2396 probe set) and more broadly across legumes (Fabaceae1005 probe  
535 set). We used our CAPTUREAL pipeline to refine phylogenomic and population genomic analyses  
536 using taxon-specific and longer reference sequences. This procedure has both benefits and  
537 drawbacks. An advantage is that different but overlapping probe sets amenable for efficient  
538 target capture in different focal groups can be identified, and that a single enriched DNA  
539 library can be included in multiple data sets spanning different evolutionary timescales. On  
540 the other hand, bioinformatic analyses took longer due to the iterative refinement, and only  
541 a portion of captured sequence data was ultimately used for phylogenomic or population  
542 genomic analyses in each focal group (see Tables S1 – S3). Higher costs per used sequence  
543 could be compensated by enriching DNA of up to six individuals in a single hybridization  
544 reaction, a strategy that has been used successfully in other studies (e.g., de La Harpe et al.,  
545 2018; Yardeni et al., 2021).

546

#### 547 **4.2 | CAPTUREAL bioinformatics pipeline**

548 The CAPTUREAL pipeline starts with the mapping of quality-trimmed reads to conserved target  
549 regions identified during probe design, followed by assembly on a per-region basis, orthology  
550 assessment, and filtering for target regions with high capture sensitivity and specificity for  
551 downstream analyses. This approach differs from the PHYLUCE pipeline (Faircloth, 2016),  
552 where quality-trimmed reads are first assembled, and then matched to target regions.  
553 CAPTUREAL simplifies the assembly of reads specific to each locus, circumventing the

554 challenging task of *de novo* assembly of contigs from the large pool of sequencing reads  
555 representative of thousands of loci (reviewed by Chaisson et al., 2015). Likewise, alignments  
556 are conducted in clearly defined target regions in which overlap among individual contigs is  
557 higher. However, assembly per region is more time-consuming and requires reference  
558 sequences for the initial mapping step. This might introduce a reference bias when divergent  
559 sequences are not mapped (Lunter & Goodson, 2011). We addressed this problem by  
560 generating consensus sequences that are representative of a given taxon set and by limiting  
561 analyses to target regions that can be efficiently recovered in all groups of that taxon set.  
562 These set-specific reference sequences can then be used to iteratively refine mapping,  
563 assembly, and target region filtering for any set of taxa. Our approach is conceptually similar  
564 to the HYBPIPER pipeline (Johnson et al., 2016), which also employs a mapping-assembly  
565 strategy, and uses depth of coverage and percent identity to the target region to choose  
566 between multiple contigs, before it identifies intron/exon boundaries using target peptide  
567 sequences and extracts coding sequences for alignment. While the HYBPIPER pipeline is  
568 designed specifically for the HYB-SEQ approach (Johnson et al., 2016), in which exons are the  
569 primary targets and flanking non-coding regions are used as supplementary data for analyses  
570 at shallow evolutionary scales (Weitemier et al., 2014), CAPTUREAI is more general in scope and  
571 neither requires nor leverages knowledge about intron/exon boundaries in the targeted  
572 regions. It is therefore suitable for application in systems lacking high-quality annotated  
573 reference genomes or transcriptomes. The main strengths of this pipeline are its modularity,  
574 which allows for an iterative refinement of read mapping, assembly and alignment, its  
575 flexibility given by user-defined parameters, the merging of alignments representing

576 physically overlapping target regions, and the visualization of key summary statistics and  
577 alignments along the workflow to inform the user on critical analysis parameters.

578

### 579 **4.3 | Macro- and micro-evolutionary patterns in *Dalbergia***

580 *Dalbergia* species endemic to Madagascar were recovered as two large, well-supported and  
581 fully resolved clades, each exclusively comprising Malagasy species. These two clades were  
582 previously identified on the basis of three chloroplast markers, but phylogenetic relationships  
583 within clades were not resolved, which exposed traditional DNA barcoding as insufficient for  
584 genetic discrimination between closely related *Dalbergia* species (Hassold et al., 2016; see  
585 Tables S2 and S3). Supergroup I and II are morphologically divergent and largely correspond  
586 to Group 1 and 2 reported by Bosser & Rabevohitra (2002). Supergroup I is characterized by a  
587 glabrous gynoeceum with a long and slender style and relatively large flowers, while  
588 Supergroup II is characterized by a pubescent gynoeceum with a short and squat style and  
589 relatively small flowers. The two supergroups are both more closely related to non-Malagasy  
590 taxa than to each other, suggesting at least two independent colonizations of Madagascar  
591 followed by species diversification. The only sampled Malagasy species not belonging to either  
592 of the two supergroups is *D. bracteolata*, which occurs on Madagascar as well as in mainland  
593 East Africa. A further species, which is endemic to Madagascar and morphologically divergent  
594 from Supergroups I and II (*D. xerophila* Bosser & R. Rabev.) was not included in this study.

595         Within Supergroup I, two well-supported subclades were resolved, which differ in their  
596 inflorescence structure. Within *Dalbergia chapelieri* s.l., a widely distributed species complex  
597 with paniculate inflorescences, northeastern and southeastern populations can be  
598 distinguished using the present data as well as chloroplast variation (Hassold et al., 2016). The

599 other subclade within Supergroup I contains species from eastern Madagascar with mostly  
600 racemose inflorescences, including a potentially new species, *Dalbergia* sp. 24. Collections  
601 belonging to this entity were previously believed to be conspecific with *D. maritima* var.  
602 *pubescens* (see Hassold et al., 2016) but show geographic (i.e., north-east vs. central-east),  
603 morphological (i.e., more numerous leaflets that are smaller, more oblong and less  
604 coriaceous) and genetic (Figure 2, Figure S3) differences compared to the type material  
605 (*Service Forestier 32824*). The type (collected in 1985) showed a slightly longer terminal  
606 branch compared to other samples in the concatenation tree (Figure S3) but clearly grouped  
607 with two recently collected conspecific samples from central-east Madagascar. The same  
608 subclade also contains material of two highly valued rosewood species, *D. occulta* and *D.*  
609 *normandii* (note that in Hassold et al. (2016), sterile material of *D. normandii* was erroneously  
610 identified as *D. madagascariensis*).

611         Supergroup II includes two clades distributed in the humid and sub-humid east and  
612 northwest of Madagascar, and a large third clade centered in the drier west and north of the  
613 island. Morphological synapomorphies characterizing these clades require further genetic and  
614 morphological analyses. The geographic separation in major eco-geographic regions of  
615 Madagascar suggests that climate regimes may have played a significant role in shaping the  
616 evolution of these groups, which thus constitute promising model systems to study processes  
617 of ecological divergence, along the same lines as studies that have investigated elements of  
618 the Malagasy fauna (Vences et al., 2009).

619         Our results revealed relationships among Supergroups I and II and non-Malagasy taxa  
620 that are incompatible with the plastid phylogeny of Hassold et al. (2016), in particular with  
621 regard to *Dalbergia melanoxydon* (Africa), *D. ecastaphyllum* (America and Africa), and *D. cf.*

622 *oliveri* (Asia). Incongruence between nuclear and plastid phylogenies is common at various  
623 evolutionary timescales in many plant groups (e.g., Lee et al., 2021; Pelsner et al., 2010), and  
624 while the multispecies approach applied in this study is expected to return a phylogeny that  
625 reflects nuclear evolution accounting for incomplete lineage sorting, conflicts in gene tree  
626 topologies due to hybridization and chloroplast capture can further underlie the observed  
627 differences.

628 Our target capture approach demonstrated great potential to facilitate the resolution  
629 of several taxonomic conundrums within the genus, which likely resulted from few observable  
630 and diagnostic morphological characters, insufficient collection effort, and the difficulty of  
631 distinguishing between heritable and plastic trait variation within and among *Dalbergia*  
632 species (Lachenaud, 2016). The integration of highly informative museum specimens,  
633 including a nomenclatural type collected in 1985, enabled the accurate identification of  
634 recently collected but often sterile specimens, and was crucial in detecting misidentifications  
635 or potential taxonomic inadequacies (Buerki & Baker, 2016), as shown for *D. maritima* var.  
636 *pubescens* or *D. monticola*.

637 Population genomic analyses of 51 individuals readily separated the two closely  
638 related species *Dalbergia monticola* and *D. orientalis*, as well as a sympatric and syntopic but  
639 genetically differentiated entity, which could previously not be differentiated from the other  
640 two species based on three chloroplast markers (Hassold et al., 2016). The lack of admixture  
641 between *D. monticola* and this third cluster, the similarity in leaf characters, and the absence  
642 of known morphologically similar species occurring in the region, prompts us to hypothesize  
643 the latter to reflect a separate, yet undescribed cryptic species. Both *D. monticola* and *D.*  
644 *orientalis* are distributed from northeastern to south-eastern Madagascar, co-occur in various

645 localities, but differ in their predominant altitudinal distribution (Madagascar Catalogue,  
646 2021). Population structure within both species was uncovered using our target capture  
647 approach and appears to be sufficient to distinguish specimens from the northeast (locations  
648 1 to 6), central-east (locations 7 and 8), and southeast of the island (locations 9 to 13). These  
649 results indicate that genetic species identification and provenancing, at least to this broad  
650 geographic scale, may be feasible, which would have important implications for forensic  
651 timber identification and for tracing geographic hotspots of the illegal trade in these valuable  
652 timber species (UNODC, 2016a).

653

#### 654 **4.4 | Phylogenetic analyses across legumes**

655 At the family level, 1,005 merged regions of the 6,555 targeted regions passed our stringent  
656 sensitivity and specificity filters, suggesting that many target regions were not efficiently  
657 captured across taxa. However, phylogenetic analysis of 986 nuclear target regions recovered  
658 multiple known clades within monophyletic subfamilies with strong bootstrap and quartet  
659 support, providing excellent resolution comparable to that obtained in the recent nuclear  
660 phylogenomic analysis of transcriptome and genome-wide data across legumes (Koenen et  
661 al., 2020b). As in that study, we found high support for Cercidoideae and Detarioideae as sister  
662 taxa, a relationship that was never inferred in analyses based on chloroplast genes (LPWG,  
663 2017) or plastomes (Koenen et al., 2020b; Zhang et al., 2020). As shown in both studies, the  
664 other relationships among subfamilies are difficult to resolve. Our most supported subfamily  
665 topology (38.4% quartet support, Figure S2A) recovered the Papilionoideae as sister to a clade  
666 comprised of Caesalpinioideae, Dialioideae, and the Cercidoideae/Detarioideae clade, while  
667 Koenen et al. (2020b) demonstrated a successive divergence of the

668 Cercidoideae/Detarioideae clade, Dialioideae, Caesalpinioideae and Papilionoideae in all  
669 nuclear analyses. This alternative topology received almost equivalent overall quartet support  
670 (38.36%) in our analyses (Figure S2C), as did a third hypothesis in which Caesalpinioideae and  
671 Papilionoideae are sister to Dialioideae and the Cercidoideae/Detarioideae clade (Figure S2B).  
672 These nearly equally supported subfamily topologies can be explained by short deep  
673 internodes associated with conflicting bipartitions and are consistent with the idea of a nearly  
674 simultaneous evolutionary origin of all six legume subfamilies, causing incomplete lineage  
675 sorting (Koenen et al., 2020b). Taxon sampling may additionally contribute to the contentious  
676 deep-branching relationships. The monotypic Duparquetioideae subfamily could not be  
677 analyzed, and a portion of gene trees may suffer from long branch attraction between  
678 *Polygala* and Papilionoideae, which both exhibit markedly higher substitution rates compared  
679 to the other legume subfamilies (Koenen et al., 2020b). Additional outgroup taxa such as  
680 members of the Quillajaceae family could alleviate this problem, and permit a more accurate  
681 inference of subfamily relationships.

682       Substantial gene tree incongruence was also found with respect to the relationships  
683 among the three large clades within Meso-Papilionoidae. The sister relationship between  
684 Dalbergioids s.l. and Genistoids s.l. received only slightly higher quartet support than the two  
685 alternative hypotheses, which is consistent with previous results (Koenen et al., 2020b).  
686 Similarly, conflicting topologies affected most branches within Genisteeae. By contrast, our  
687 analyses confirm that the genus *Aeschynomene* sensu RUDD (1955), which consisted of the  
688 former *A. sect. Aeschynomene* and *A. sect. Ochopodium* Vogel, is non-monophyletic (Ribeiro  
689 et al., 2007). The recently re-established *Ctenodon* (= *A. sect. Ochopodium*, Cardoso et al.,  
690 2020) is sister to *Machaerium*, and these two genera form the sister group to *Dalbergia*.



691

## 692 **4.5 | Conclusions and perspectives**

693 The resources developed here for Fabaceae and in particular the genus *Dalbergia* bridge  
694 micro- and macro-evolutionary timescales and will hopefully facilitate community-driven  
695 efforts to advance legume genomics. Comprehensive sampling and sequencing by target  
696 capture of *Dalbergia* across its distribution range, and in particular from the hotspot of  
697 diversity in Madagascar, can yield valuable insights into the origin and diversification of the  
698 genus, thereby informing conservation policies and the taxonomic revision of Malagasy  
699 *Dalbergia*. The obtained sequence data will further serve to build a reference library for  
700 molecular identification of CITES-listed *Dalbergia* species, which would make a significant  
701 contribution toward the conservation of the valuable and endangered rosewoods.

702

## 703 **ACKNOWLEDGEMENTS**

704 We thank Sonja Hassold and the Missouri Botanical Garden (MBG) Madagascar team for  
705 organising and conducting field work, the Botanic Garden of the University of Zurich for the  
706 opportunity to sample legume plants from their living collection, and to MBG in St. Louis (USA)  
707 and the Paris herbarium (P) for access to their DNA bank and voucher specimens, respectively.  
708 We also thank Peter Phillipson and Nicholas Wilding for discussing sample determinations,  
709 *Dalbergia* taxonomy and Malagasy plant diversity. We are grateful to Claudia Michel for  
710 laboratory work and the Genetic Diversity Centre Zurich (GDC) for helpful support, in  
711 particular to Silvia Kobel for sequencing and Niklaus Zemp for bioinformatics. Finally, we thank  
712 Erik Koenen, Colin Hughes, Pete Lowry, Martin Fischer and Nicholas Wilding for their valuable  
713 inputs and comments on the manuscript.

714

## 715 **AUTHOR CONTRIBUTIONS**

716 SC and AW designed the study and collected samples. SZ assembled the draft *Dalbergia*  
717 transcriptome and designed target capture probes. SC and SZ analyzed data and wrote  
718 CAPTUREAL. SC, SF and AW wrote the manuscript with contributions from SZ.

719

## 720 **DATA AVAILABILITY STATEMENT**

721 Raw target capture sequencing reads generated for this study are deposited in the European  
722 Nucleotide Archive (ENA) at EMBL-EBI under accession number PRJEB41848  
723 (<https://www.ebi.ac.uk/ena/browser/view/PRJEB41848>). Transcriptome sequencing reads as  
724 well as the draft *Dalbergia* transcriptome, sequences representing the initial 12,049 RNA  
725 probes and 6,555 target regions, the Fabaceae1005 and Dalbergia2396 probe sets, longer and  
726 taxon-specific reference sequences used for mapping, final alignments for the subfamily and  
727 species sets (all in FASTA format), and SNP data from the population set (VCF format) are  
728 available on Dryad (<https://doi.org/10.5061/dryad.73n5tb2z7>). The bioinformatics pipeline  
729 CAPTUREAL is available and further documented on Github  
730 (<https://github.com/scrameri/CaptureAI>). Because *Dalbergia* species are under threat from  
731 illegal exploitation, we have systematically refrained from making detailed distribution maps  
732 and precise geo-coordinates publicly available. Specimen records for collections from  
733 Madagascar are provided in the Catalogue of the Plants of Madagascar (Madagascar  
734 Catalogue, 2021), but with restricted public access to precise geo-coordinates (delivered on  
735 demand to bona fide researchers).

736

737 **ORCID**

738 Simon Crameri <https://orcid.org/0000-0002-5516-1018>

739 Simone Fior <https://orcid.org/0000-0003-1173-1477>

740 Alex Widmer <https://orcid.org/0000-0001-8253-5137>

741

## 742 References

- 743 Adema, F., Ohashi, H., & Sunarno, B. (2016). Notes on Malesian Fabaceae (Leguminosae-  
744 Papilionoideae) 17. The genus *Dalbergia*. *Blumea*, 61(3), 186–206.  
745 <https://doi.org/10.3767/000651916X693905>
- 746 Bankevich, A., Nurk, S., Antipov, D., Gurevich, A. A., Dvorkin, M., Kulikov, A. S., Lesin, V. M.,  
747 Nikolenko, S. I., Pham, S., Prjibelski, A. D., Pyshkin, A. V., Sirotkin, A. V., Vyahhi, N.,  
748 Tesler, G., Alekseyev, M. A., & Pevzner, P. A. (2012). SPAdes: A new genome assembly  
749 algorithm and its applications to single-cell sequencing. *Journal of Computational*  
750 *Biology*, 19(5), 455–477. <https://doi.org/10.1089/cmb.2012.0021>
- 751 Barrett, M. A., Brown, J. L., & Yoder, A. D. (2013). Conservation: Protection for trade of  
752 precious rosewood. *Nature*, 499, 29. <https://doi.org/10.1038/499029c>
- 753 Bosser, J., & Rabevohitra, R. (2002). Tribe Dalbergieae. In D. J. Du Puy, J. N. Labat, R.  
754 Rabevohitra, J. F. Villiers, J. Bosser, & J. Moat (Eds.), *The Leguminosae of Madagascar*  
755 (pp. 321–361). Royal Botanical Gardens, Kew.
- 756 Brewer, G. E., Clarkson, J. J., Maurin, O., Zuntini, A. R., Barber, V., Bellot, S., Biggs, N., Cowan,  
757 R. S., Davies, N. M. J., Dodsworth, S., Edwards, S. L., Eiserhardt, W. L., Epitawalage, N.,  
758 Frisby, S., Grall, A., Kersey, P. J., Pokorny, L., Leitch, I. J., Forest, F., & Baker, W. J. (2019).  
759 Factors affecting targeted sequencing of 353 nuclear genes from herbarium specimens  
760 spanning the diversity of Angiosperms. *Frontiers in Plant Science*, 10, 1102.  
761 <https://doi.org/10.3389/fpls.2019.01102>
- 762 Broad Institute (2019). *Picard Toolkit, version 2.21.3*. <http://broadinstitute.github.io/picard>
- 763 Buerki, S., & Baker, W. J. (2016). Collections-based research in the genomic era. *Biological*  
764 *Journal of the Linnean Society*, 117, 5–10. <https://doi.org/10.1111/bij.12721>
- 765 Camacho, C., Coulouris, G., Avagyan, V., Ma, N., Papadopoulos, J., Bealer, K., & Madden, T. L.  
766 (2009). BLAST+: Architecture and applications. *BMC Bioinformatics*, 10, 421.  
767 <https://doi.org/10.1186/1471-2105-10-421>
- 768 Cardoso, D. B. O. S., de Queiroz, L. P., Pennington, R. T., de Lima, H. C., Fonty, E.,  
769 Wojciechowski, M. F., & Lavin, M. (2012). Revisiting the phylogeny of papilionoid  
770 legumes: New insights from comprehensively sampled early-branching lineages.  
771 *American Journal of Botany*, 99(12), 1991–2013. <https://doi.org/10.3732/ajb.1200380>
- 772 Cardoso, D., Pennington, R. T., de Queiroz, L. P., Boatwright, J. S., Van Wyk, B. E.,  
773 Wojciechowski, M. F., & Lavin, M. (2013). Reconstructing the deep-branching  
774 relationships of the papilionoid legumes. *South African Journal of Botany*, 89, 58–75.  
775 <http://dx.doi.org/10.1016/j.sajb.2013.05.001>
- 776 Cardoso, D. B. O. S., Mattos, C. M. J., Filardi, F., Delgado-Salinas, A., Lavin, M., de Moraes, P.  
777 L. R., Tapia-Pastrana, F., & de Lima, H. C. (2020). A molecular phylogeny of the  
778 pantropical papilionoid legume *Aeschynomene* supports reinstating the ecologically  
779 and morphologically coherent genus *Ctenodon*. *Neodiversity*, 13(1), 1–38.  
780 <http://doi.org/10.13102/neod.131.1>
- 781 Chaisson, M. J. P., Wilson, R. K., & Eichler, E. E. (2015). Genetic variation and the *de novo*  
782 assembly of human genomes. *Nature Reviews Genetics*, 16, 627–640.  
783 <https://doi.org/10.1038/nrg3933>
- 784 CITES (2020). *Appendices I, II and III*. Convention on International Trade in Endangered Species  
785 of Wild Fauna and Flora. Retrieved 27 January, 2021, from  
786 <https://cites.org/eng/app/appendices.php>

- 787 Cramer, S. (2020). *Phylogenomics, species discovery and integrative taxonomy in Dalbergia*  
788 *(Fabaceae) precious woods from Madagascar* [Doctoral thesis, ETH Zurich, Zurich,  
789 Switzerland. <https://doi.org/10.3929/ethz-b-000487274>
- 790 [dataset] Cramer, S., Fior, S., Zoller, S., & Widmer, A. (2022) Data from: A target capture  
791 approach for phylogenomic analyses at multiple evolutionary timescales in  
792 rosewoods (*Dalbergia* spp.) and the legume family (Fabaceae). European Nucleotide  
793 Archive (ENA). <https://www.ebi.ac.uk/ena/browser/view/PRJEB41848>
- 794 [dataset] Cramer, S., Fior, S., Zoller, S., & Widmer, A. (2022) Data from: A target capture  
795 approach for phylogenomic analyses at multiple evolutionary timescales in  
796 rosewoods (*Dalbergia* spp.) and the legume family (Fabaceae). Dryad Digital  
797 Repository. <https://doi.org/10.5061/dryad.73n5tb2z7>
- 798 Cutter, A. D. (2013). Integrating phylogenetics, phylogeography and population genetics  
799 through genomes and evolutionary theory. *Molecular Phylogenetics and Evolution*,  
800 69(3), 1172–1185. <https://doi.org/10.1016/j.ympev.2013.06.006>
- 801 Danecek, P., Auton, A., Abecasis, G., Albers, C. A., Banks, E., DePristo, M. A., Handsaker, R. E.,  
802 Lunter, G., Marth, G.T., Sherry, S. T., McVean, G., Durbin, R., & 1000 Genomes Project  
803 Analysis Group (2011). The variant call format and VCFtools. *Bioinformatics*, 27(15),  
804 2156–2158. <https://doi.org/10.1093/bioinformatics/btr330>
- 805 de Carvalho, A.M. (1997). A synopsis of the genus *Dalbergia* (Fabaceae: Dalbergieae) in Brazil.  
806 *Brittonia*, 49, 87–109. <https://doi.org/10.2307/2807701>
- 807 de La Harpe, M., Paris, M., Karger, D. N., Rolland, J., Kessler, M., Salamin, N., & Lexer, C. (2017).  
808 Molecular ecology studies of species radiations: current research gaps, opportunities  
809 and challenges. *Molecular Ecology*, 26(10), 2608–2622.  
810 <https://doi.org/10.1111/mec.14110>
- 811 de La Harpe, M., Hess, J., Loiseau, O., Salamin, N., Lexer, C., & Paris, M. (2018). A dedicated  
812 target capture approach reveals variable genetic markers across micro- and macro-  
813 evolutionary time scales in palms. *Molecular Ecology Resources*, 19(1), 221–234.  
814 <https://doi.org/10.1111/1755-0998.12945>
- 815 de Sousa, F., Bertrand, Y. J. K., Nylinder, S., Oxelman, B., Eriksson, J. S., & Pfeil, B. E. (2014).  
816 Phylogenetic properties of 50 nuclear loci in *Medicago* (Leguminosae) generated using  
817 multiplexed sequence capture and next-generation sequencing. *PLoS ONE*, 9(10),  
818 e109704. <https://doi.org/10.1371/journal.pone.0109704>
- 819 Dowle, M., & Srinivasan, A. (2019). *data.table: Extension of `data.frame`. R package version*  
820 *1.12.8*. <https://CRAN.R-project.org/package=data.table>
- 821 Doyle, J. J., & Doyle, J. L. (1987). A rapid DNA isolation procedure for small quantities of fresh  
822 leaf tissue. *Phytochemical Bulletin*, 19(1), 11–15.
- 823 Egan, A. N., & Vatanparast, M. (2019). Advances in legume research in the genomics era.  
824 *Australian Systematic Botany*, 32(6), 459–483. <https://doi.org/10.1071/SB19019>
- 825 Faircloth, B. C. (2016). PHYLUCE is a software package for the analysis of conserved genomic  
826 loci. *Bioinformatics*, 32(5), 786–788. <https://doi.org/10.1093/bioinformatics/btv646>
- 827 Faircloth, B. C., McCormack, J. E., Crawford, N. G., Harvey, M. G., Brumfield, R. T., & Glenn, T.  
828 C. (2012). Ultraconserved elements anchor thousands of genetic markers spanning  
829 multiple evolutionary timescales. *Systematic Biology*, 61(5), 717–726.  
830 <https://doi.org/10.1093/sysbio/sys004>

- 831 Garrison, E. (2012). *Vcfliib: A C++ library for parsing and manipulating VCF files*. Github.  
832 <https://github.com/ekg/vcfliib>
- 833 Garrison, E., & Marth, G. (2012). Haplotype-based variant detection from short-read  
834 sequencing. *arXiv*, 1207.3907. <https://arxiv.org/abs/1207.3907>
- 835 Grabherr, M. G., Haas, B. J., Yassour, M., Levin, J. Z., Thompson, D. A., Amit, I., Adiconis, X.,  
836 Fan, L., Raychowdhury, R., Zeng, Q., Chen, Z., Mauceli, E., Hacohen, N., Gnirke, A.,  
837 Rhind, N., di Palma, F., Birren, B. W., Nusbaum, C., Lindblad-Toh, K., Friedman, N., &  
838 Regev, A. (2011). Full-length transcriptome assembly from RNA-Seq data without a  
839 reference genome. *Nature Biotechnology*, 29, 644–652.  
840 <https://doi.org/10.1038/nbt.1883>
- 841 Hahn, C., Bachmann, L., & Chevreur, B. (2013). Reconstructing mitochondrial genomes directly  
842 from genomic next-generation sequencing reads – a baiting and iterative mapping  
843 approach. *Nucleic Acids Research*, 41(13), e129. <https://doi.org/10.1093/nar/gkt371>
- 844 Hassold, S., Lowry II, P. P., Bauert, M. R., Razafintsalama, A., Ramamonjisoa, L., & Widmer, A.  
845 (2016). DNA barcoding of Malagasy rosewoods: towards a molecular identification of  
846 CITES-listed *Dalbergia* species. *PLoS ONE*, 11(6), e0157881.  
847 <https://doi.org/10.1371/journal.pone.0157881>
- 848 Hughes, C. E., & Eastwood, R. (2006). Island radiation on a continental scale: Exceptional rates  
849 of plant diversification after uplift of the Andes. *Proceedings of the National Academy  
850 of Sciences of the United States of America*, 103(27), 10334–10339.  
851 <https://doi.org/10.1073/pnas.0601928103>
- 852 Johnson, M. G., Gardner, E. M., Liu, Y., Medina, R., Goffinet, B., Shaw, A.J., Zerega, N. J. C., &  
853 Wickett, N. J. (2016). HybPiper: Extracting coding sequence and introns for  
854 phylogenetics from high-throughput sequencing reads using target enrichment.  
855 *Applications in Plant Sciences*, 4(7), 1600016. <https://doi.org/10.3732/apps.1600016>
- 856 Johnson, M. G., Pokorny, L., Dodsworth, S., Botigué, L. R., Cowan, R. S., Devault, A., Eiserhardt,  
857 W. L., Epitawalage, N., Forest, F., Kim, J. T., Leebens-Mack, J. H., Leitch, I. J., Maurin,  
858 O., Soltis, D. E., Soltis, P. S., Wong, G. K.-S., Baker, W. J., & Wickett, N. J. (2019). A  
859 universal probe set for targeted sequencing of 353 nuclear genes from any flowering  
860 plant designed using k-medoids clustering. *Systematic Biology*, 68(4), 594–606.  
861 <https://doi.org/10.1093/sysbio/syy086>
- 862 Jombart, T. (2008). adegenet: a R package for the multivariate analysis of genetic markers.  
863 *Bioinformatics*, 24(11), 1403–1405. <https://doi.org/10.1093/bioinformatics/btn129>
- 864 Jombart, T., & Ahmed, I. (2011). adegenet 1.3-1: new tools for the analysis of genome-wide  
865 SNP data. *Bioinformatics*, 27(21), 3070–3071.  
866 <https://doi.org/10.1093/bioinformatics/btr521>
- 867 Jones, M. R., & Good, J. M. (2016). Targeted capture in evolutionary and ecological genomics.  
868 *Molecular Ecology*, 25(1), 185–202. <https://doi.org/10.1111/mec.13304>
- 869 Junier, T., & Zdobnov, E. M. (2010). The Newick utilities: high-throughput phylogenetic tree  
870 processing in the UNIX shell. *Bioinformatics*, 26(13), 1669–1670.  
871 <https://onlinelibrary.wiley.com/doi/10.1111/mec.13304>
- 872 Kamvar, Z. N., Tabima, J. F., & Grünwald, N. J. (2014). Poppr: an R package for genetic analysis  
873 of populations with clonal, partially clonal, and/or sexual reproduction. *PeerJ*, 2, e281.  
874 <https://doi.org/10.7717/peerj.281>

- 875 Katoh, K., & Standley, D.M. (2013). MAFFT multiple sequence alignment software version 7:  
876 improvements in performance and usability. *Molecular Biology and Evolution*, 30(4),  
877 772–780. <https://doi.org/10.1093/molbev/mst010>
- 878 Knaus, B. J., & Grünwald, N. J. (2017). vcfr: a package to manipulate and visualize variant call  
879 format data in R. *Molecular Ecology Resources*, 17(1), 44–53.  
880 <https://doi.org/10.1111/1755-0998.12549>
- 881 Koenen, E. J. M., Kidner, C., Souza, E. R., Simon, M. F., Iganci, J. R., Nicholls, J. A., Brown, G. K.,  
882 de Queiroz, L. P., Luckow, M., Lewis, G. P., Pennington, R. T., & Hughes, C. E. (2020a).  
883 Hybrid capture of 964 nuclear genes resolves evolutionary relationships in the  
884 mimosoid legumes and reveals the polytomous origins of a large pantropical radiation.  
885 *American Journal of Botany*, 107(12), 1710–1735. <https://doi.org/10.1002/ajb2.1568>
- 886 Koenen, E. J. M., Ojeda, D. I., Steeves, R., Migliore, J., Bakker, F. T., Wieringa, J. J., Kidner, C.,  
887 Hardy, O. J., Pennington, R. T., Bruneau, A., & Hughes, C. E. (2020b). Large-scale  
888 genomic sequence data resolve the deepest divergences in the legume phylogeny and  
889 support a near-simultaneous evolutionary origin of all six subfamilies. *New Phytologist*,  
890 225(3), 1355–1369. <https://doi.org/10.1111/nph.16290>
- 891 Koenen, E. J. M., Ojeda, D. I., Bakker, F. T., Wieringa, J. J., Kidner, C., Hardy, O. J., Pennington,  
892 R. T., Herendeen, P. S., Bruneau, A., & Hughes, C. E. (2021). The origin of the legumes  
893 is a complex paleopolyploid phylogenomic tangle closely associated with the  
894 Cretaceous-Paleogene (K-Pg) mass extinction event. *Systematic Biology*, 70(3), 508–  
895 526. <https://doi.org/10.1093/sysbio/syaa041>
- 896 Kopelman, N. M., Mayzel, J., Jakobsson, M., Rosenberg, N. A., & Mayrose, I. (2015). Clumpak:  
897 a program for identifying clustering modes and packaging population structure  
898 inferences across *K*. *Molecular Ecology Resources*, 15(5), 1179–1191.  
899 <https://doi.org/10.1111/1755-0998.12387>
- 900 Lachenaud, O. (2016). *Dalbergia* L. f., nom. cons. Pp. 101–153 in: *Flore du Gabon* (vol. 49), M.  
901 S. M. Sosef, J. Florence, L. Ngok Banak, H. P. Bourobou Bourobou, P. Bissiengou et al.,  
902 Margraf Publishers, Leiden.
- 903 Lavin, M., Pennington, R. T., Klitgaard, B. B., Spret, J. I., de Lima, H. C., & Gasson, P. E. (2001).  
904 The dalbergioid legumes (Fabaceae): delimitation of a pantropical monophyletic clade.  
905 *American Journal of Botany*, 88(3), 503–533. <https://doi.org/10.2307/2657116>
- 906 Lee, A. K., Gilman, I. S., Srivastav, M., Lerner, A. D., Donoghue, M. J., & Clement, W. L. (2021).  
907 Reconstructing Dipsacales phylogeny using Angiosperms353: issues and insights.  
908 *American Journal of Botany*, 108(7), 1122–1142. <https://doi.org/10.1002/ajb2.1695>
- 909 Lemmon, A. R., Emme, S. A., & Lemmon, E. M. (2012). Anchored hybrid enrichment for  
910 massively high-throughput phylogenomics. *Systematic Biology*, 61(5), 727–744.  
911 <https://doi.org/10.1093/sysbio/sys049>
- 912 Li, H. (2013). Aligning sequence reads, clone sequences and assembly contigs with BWA-MEM.  
913 *arXiv*. <https://arxiv.org/abs/1303.3997>
- 914 Li, H., & Durbin, R. (2009). Fast and accurate short read alignment with Burrows-Wheeler  
915 transform. *Bioinformatics*, 25(14), 1754–1760.  
916 <https://doi.org/10.1093/bioinformatics/btp324>
- 917 Lindenbaum, P. (2015). *Jvarkit: java utilities for bioinformatics*. Github.  
918 <https://github.com/lindenb/jvarkit>

- 919 LPWG (Legume Phylogeny Working Group) (2017). A new subfamily classification of the  
920 Leguminosae based on a taxonomically comprehensive phylogeny. *Taxon*, 66(1), 44–  
921 77. <https://doi.org/10.12705/661.3>
- 922 Lunter, G., & Goodson, M. (2011). Stampy: A statistical algorithm for sensitive and fast  
923 mapping of Illumina sequence reads. *Genome Research*, 21, 936–939.  
924 <https://doi.org/10.1101/gr.111120.110>
- 925 Madagascar Catalogue (2021). *Catalogue of the Plants of Madagascar*. Missouri Botanical  
926 Garden, St. Louis, USA. Retrieved November 19, 2021, from  
927 <http://www.tropicos.org/Project/Madagascar>
- 928 Mamanova, L., Coffey, A. J., Scott, C. E., Kozarewa, I., Turner, E. H., Kumar, A., Howard, E.,  
929 Shendure, J., & Turner, D. J. (2010). Target-enrichment strategies for next-generation  
930 sequencing. *Nature Methods*, 7, 111–118. <https://doi.org/10.1038/nmeth.1419>
- 931 Mandel, J. R., Dikow, R. B., Funk, V. A., Masalia, R. R., Staton, S. E., Kozik, A., Michelmore, R.  
932 W., Rieseberg, L. H., & Burke, J. M. (2014). A target enrichment method for gathering  
933 phylogenetic information from hundreds of loci: an example from the *Compositae*.  
934 *Applications in Plant Sciences*, 2(2), 1300085. <https://doi.org/10.3732/apps.1300085>
- 935 McMahan, M., & Hufford, L. (2004). Phylogeny of Amorpheae (Fabaceae: Papilionoideae).  
936 *American Journal of Botany*, 91(8), 1219–1230. <https://doi.org/10.3732/ajb.91.8.1219>
- 937 Mirarab, S., Reaz, R., Bayzid, M. S., Zimmermann, T., Swenson, M. S., & Warnow, T. (2014).  
938 ASTRAL: genome-scale coalescent-based species tree estimation. *Bioinformatics*,  
939 30(17), i541–i548. <https://doi.org/10.1093/bioinformatics/btu462>
- 940 Mousavi-Derazmahalleh, M., Bayer, P. E., Hane, J. K., Valliyodan, B., Nguyen, H. T., Nelson, M.  
941 N., Erskine, W., Varshney, R. K., Papa, R., & Edwards, D. (2018). Adapting legume crops  
942 to climate change using genomic approaches. *Plant, Cell & Environment*, 42(1), 6–19.  
943 <https://doi.org/10.1111/pce.13203>
- 944 Nicholls, J. A., Pennington, R. T., Koenen, E. J. M., Hughes, C. E., Hearn, J., Bunnefeld, L., Dexter,  
945 K. G., Stone, G. N., & Kidner, C. A. (2015). Using targeted enrichment of nuclear genes  
946 to increase phylogenetic resolution in the neotropical rain forest genus *Inga*  
947 (Leguminosae: Mimosoideae). *Frontiers in Plant Science*, 6, 710.  
948 <https://doi.org/10.3389/fpls.2015.00710>
- 949 Ottenlips, M. V., Mansfield, D.H., Buerki, S., Feist, M. A. E., Downie, S. R., Dodsworth, S., Forest,  
950 F., Plunkett, G. M., & Smith, J. F. (2021). Resolving species boundaries in a recent  
951 radiation with the Angiosperms353 probe set: the *Lomatium packardiae*/*L. anomalum*  
952 clade of the *L. triternatum* (Apiaceae) complex. *American Journal of Botany*, 108(7),  
953 1217–1233. <https://doi.org/10.1002/ajb2.1676>
- 954 Paradis, E., & Schliep, K. (2018). ape 5.0: an environment for modern phylogenetics and  
955 evolutionary analyses in R. *Bioinformatics*, 35(3), 526–528.  
956 <https://doi.org/10.1093/bioinformatics/bty633>
- 957 Pelsner, P. B., Kennedy, A. H., Tepe, E. J., Shidler, J. B., Nordenstam, B., Kadereit, J. W., &  
958 Watson, L. E. (2010). Patterns and causes of incongruence between plastid and nuclear  
959 Senecioneae (Asteraceae) phylogenies. *American Journal of Botany* 97(5), 856–873.  
960 <https://doi.org/10.3732/ajb.0900287>
- 961 Peng, Z., Fan, W., Wang, L., Paudel, D., Leventini, D., Tillman, B. L., & Wang, J. (2017). Target  
962 enrichment sequencing in cultivated peanut (*Arachis hypogaea* L.) using probes



- 963 designed from transcript sequences. *Molecular Genetics and Genomics*, 292, 955–965.  
964 <https://doi.org/10.1007/s00438-017-1327-z>
- 965 Prain, D. (1904). The Species of *Dalbergia* of South-Eastern Asia. *Annals of the Royal Botanic*  
966 *Garden, Calcutta*, 10(1), 1–114.
- 967 Pritchard, J. K., Stephens, M., & Donnelly, P. (2000). Inference of population structure using  
968 multilocus genotype data. *Genetics*, 155(2), 945–959.
- 969 Prum, R. O., Berv, J. S., Dornburg, A., Field, D. J., Townsend, J. P., Lemmon, E. M., & Lemmon,  
970 A. R. (2015). A comprehensive phylogeny of birds (Aves) using targeted next-  
971 generation DNA sequencing. *Nature*, 526, 569–573.  
972 <https://doi.org/10.1038/nature15697>
- 973 Quinlan, A. R., & Hall, I. M. (2010). BEDTools: a flexible suite of utilities for comparing genomic  
974 features. *Bioinformatics*, 26(6), 841–842.  
975 <https://doi.org/10.1093/bioinformatics/btq033>
- 976 R Core Team (2020). R: A language and environment for statistical computing. R Foundation  
977 for Statistical Computing, Vienna, Austria. <https://www.R-project.org>
- 978 Ribeiro, R. A., Lavin, M., Lemos-Filho, J. P., & Filho, C. (2007). The genus *Machaerium*  
979 (Leguminosae) is more closely related to *Aeschynomene* Sect. *Ochopodium* than to  
980 *Dalbergia*: Inferences from combined sequence data. *Systematic Botany*, 32(4), 762–  
981 771. <https://doi.org/10.1043/06-79.1>
- 982 Rissler, L. J. (2016). Union of phylogeography and landscape genetics. *Proceedings of the*  
983 *National Academy of Sciences of the United States of America*, 113(29), 8079–8086.  
984 <https://doi.org/10.1073/pnas.1601073113>
- 985 Safonova, Y., Bankevich, A., & Pevzner, P. A. (2015). dipSPAdes: assembler for highly  
986 polymorphic diploid genomes. *Journal of Computational Biology*, 22(6), 528–545.  
987 <https://doi.org/10.1089/cmb.2014.0153>
- 988 Saitou, N., & Nei, M. (1987). The neighbor-joining method: a new method for reconstructing  
989 phylogenetic trees. *Molecular Biology and Evolution*, 4(4), 406–425.
- 990 Schuurman, D., & Lowry II, P. P. (2009). The Madagascar rosewood massacre. *Madagascar*  
991 *Conservation and Development*, 4, 98–102. <https://doi.org/10.4314/mcd.v4i2.48649>
- 992 Shah, T., Schneider, J. V., Zizka, G., Maurin, O., Baker, W., Forest, F., Brewer, G. E., Savolainen,  
993 V., Darbyshire, I., & Larridon, I. (2021). Joining forces in *Ochnaceae* phylogenomics: a  
994 tale of two targeted sequencing probe kits. *American Journal of Botany*, 108(7), 1201–  
995 1216. <https://doi.org/10.1002/ajb2.1682>
- 996 Shavon, R. S., Osaloo, S. K., Maassoumii, A. A., Moharrek, F., Erkul, S. K., Lemmon, A. R.,  
997 Lemmon, E. M., Michalak, I., Muellner-Riehl, A. N., & Favre, A. (2017). Increasing  
998 phylogenetic support for explosively radiating taxa: The promise of high-throughput  
999 sequencing for *Oxytropis* (Fabaceae). *Journal of Systematics and Evolution*, 55(4), 385–  
1000 404. <https://doi.org/10.1111/jse.12269>
- 1001 Siniscalchi, C. M., Hidalgo, O., Palazzesi, L., Pellicer, J., Pokorny, L., Maurin, O., Leitch, I. J.,  
1002 Forest, F., Baker, W. J., & Mandel, J. R. (2021). Lineage-specific vs. universal: A  
1003 comparison of the Compositae1061 and Angiosperms353 enrichment panels in the  
1004 sunflower family. *Applications in Plant Sciences*, 9(7), e11422.  
1005 <https://doi.org/10.1002/aps3.11422>
- 1006 Slater, G. S. C., & Birney, E. (2005). Automated generation of heuristics for biological sequence  
1007 comparison. *BMC Bioinformatics*, 6, 31. <https://doi.org/10.1186/1471-2105-6-31>

- 1008 Smith, T. F., & Waterman, M. S. (1981). Identification of common molecular sequences.  
1009 *Journal of Molecular Biology* 147, 195–197.
- 1010 Sprent, J. I., Ardley, J., & James, E. K. (2017). Biogeography of nodulated legumes and their  
1011 nitrogen-fixing symbionts. *New Phytologist*, 215(1), 40–56.  
1012 <https://doi.org/10.1111/nph.14474>
- 1013 Stamatakis, A. (2014). RAxML version 8: a tool for phylogenetic analysis and post-analysis of  
1014 large phylogenies. *Bioinformatics*, 30(9), 1312–1313.  
1015 <https://doi.org/10.1093/bioinformatics/btu033>
- 1016 Tange, O. (2011). GNU parallel: the command-line power tool. *Linux Magazine*, 36(1), 42–47.  
1017 <https://www.usenix.org/system/files/login/articles/105438-Tange.pdf>
- 1018 Thomas, S. K., Liu, X., Du, Z. Y., Dong, Y., Cummings, A., Pokorny, L., Xiang, Q. Y., & Leebens-  
1019 Mack, J. H. (2021). Comprehending Cornales: phylogenetic reconstruction of the order  
1020 using the Angiosperms353 probe set. *American Journal of Botany*, 108(7), 1112–1121.  
1021 <https://doi.org/10.1002/ajb2.1696>
- 1022 Ufimov, R., Zeisek, V., Pišová, S., Baker, W.J., Fér, T., van Loo, M., Dobeš, C., & Schmickl, R.  
1023 (2021). Relative performance of customized and universal probe sets in target  
1024 enrichment: A case study in subtribe Malinae. *Applications in Plant Sciences*, 9(7),  
1025 e11442. <https://doi.org/10.1002/aps3.11442>
- 1026 UNODC (United Nations Office on Drugs and Crime) (2016a). Best practice guide for forensic  
1027 timber identification. United Nations, New York.  
1028 [https://www.unodc.org/documents/Wildlife/Guide\\_Timber.pdf](https://www.unodc.org/documents/Wildlife/Guide_Timber.pdf)
- 1029 UNODC (United Nations Office on Drugs and Crime) (2016b). World wildlife crime report:  
1030 trafficking in protected species. United Nations, New York.  
1031 [https://www.unodc.org/documents/data-and-](https://www.unodc.org/documents/data-and-analysis/wildlife/World_Wildlife_Crime_Report_2016_final.pdf)  
1032 [analysis/wildlife/World Wildlife Crime Report 2016 final.pdf](https://www.unodc.org/documents/data-and-analysis/wildlife/World_Wildlife_Crime_Report_2016_final.pdf)
- 1033 UNODC (United Nations Office on Drugs and Crime) (2020). World wildlife crime report:  
1034 trafficking in protected species. United Nations, New York.  
1035 [https://www.unodc.org/documents/data-and-](https://www.unodc.org/documents/data-and-analysis/wildlife/2020/World_Wildlife_Report_2020_9July.pdf)  
1036 [analysis/wildlife/2020/World Wildlife Report 2020 9July.pdf](https://www.unodc.org/documents/data-and-analysis/wildlife/2020/World_Wildlife_Report_2020_9July.pdf)
- 1037 Vardeman, E., & Runk, J. V. (2020). Panama’s illegal rosewood logging boom from *Dalbergia*  
1038 *retusa*. *Global Ecology and Conservation*, 23, e01098.  
1039 <https://doi.org/10.1016/j.gecco.2020.e01098>
- 1040 Vatanparast, M., Powell, A., Doyle, J. J., & Egan, A. N. (2018). Targeting legume loci: A  
1041 comparison of three methods for target enrichment bait design in Leguminosae  
1042 phylogenomics. *Applications in Plant Sciences*, 6(3), e1036.  
1043 <https://doi.org/10.1002/aps3.1036>
- 1044 Vences, M., Wollenberg, K. C., Vieites, D. R., & Lees, D. C. (2009). Madagascar as a model  
1045 region of species diversification. *Trends in Ecology and Evolution*, 24(8), 456–465.  
1046 <https://doi.org/10.1016/j.tree.2009.03.011>
- 1047 Waeber, P. O., Schuurman, D., Ramamonjisoa, B., Langrand, M., Barber, C. V., Innes, J. L.,  
1048 Lowry II, P. P., & Wilmé, L. (2019). Uplisting of Malagasy precious woods critical for  
1049 their survival. *Biological Conservation*, 235, 89–92.  
1050 <https://doi.org/10.1016/j.biocon.2019.04.007>
- 1051 WCVP (2021). *World Checklist of Vascular Plants, version 2.0*. Facilitated by the Royal Botanic  
1052 Gardens, Kew. Retrieved November 19, 2021, from <http://wcvp.science.kew.org>

- 1053 Weitemier, K., Straub, S. C. K., Cronn, R. C., Fishbein, M., Schmickl, R., McDonnell, A., & Liston,  
1054 A. (2014). Hyb-Seq: Combining target enrichment and genome skimming for plant  
1055 phylogenomics. *Applications in Plant Sciences*, 2(9), 1400042.  
1056 <https://doi.org/10.3732/apps.1400042>
- 1057 Wickham, H., Averick, M., Bryan, J., Chang, W., McGowan, L., François, R., Grolemund, G.,  
1058 Hayes, A., Henry, L., Hester, J., Kuhn, M., Pedersen, T., Miller, E., Bache, S., Müller, K.,  
1059 Ooms, J., Robinson, D., Seidel, D., Spinu, V., Takahashi, K., Vaughan, D., Wilke, C., Woo,  
1060 K., & Yutani, H. (2019). Welcome to the Tidyverse. *The Journal of Open Source*  
1061 *Software*, 4(43), 1686. <https://doi.org/10.21105/joss.01686>
- 1062 Wilding, N., Phillipson, P. B., Andriambololonera, S., Bernard, R., Cramer, S., Rakotonirina, N.,  
1063 Rakotovo, C., Randrianaivo, R., Razakamalala, R., & Lowry II, P. P. (2021a). Taxonomic  
1064 studies on Malagasy *Dalbergia* (Fabaceae). I. Two new species from northern  
1065 Madagascar, and an emended description for *D. manongarivensis*. *Candollea*, 76(2),  
1066 237–249. <https://doi.org/10.15553/c2021v762a4>
- 1067 Wilding, N., Phillipson, P. B., & Cramer, S. (2021b). Taxonomic studies on Malagasy *Dalbergia*  
1068 (Fabaceae). II. A new name for *D. mollis* and the reinstatement of *D. chermesonii*.  
1069 *Candollea*, 76(2), 251–257. <https://doi.org/10.15553.c2021v762a5>
- 1070 Wojciechowski, M. F. (2013). Towards a new classification of Leguminosae: Naming clades  
1071 using non-Linnaean phylogenetic nomenclature. *South African Journal of Botany*, 89,  
1072 85–93. <http://dx.doi.org/10.1016/j.sajb.2013.06.017>
- 1073 Wojciechowski, M. F., Lavin, M., & Sanderson, M. J. (2004). A phylogeny of legumes  
1074 (Leguminosae) based on analysis of the plastid *matK* gene resolves many well-  
1075 supported subclades within the family. *American Journal of Botany*, 91(11), 1846–  
1076 1862. <https://doi.org/10.3732/ajb.91.11.1846>
- 1077 Yardeni, G., Viruel, J., Paris, M., Hess, J., Crego, C. G., de La Harpe, M., Rivera, N., Barfuss, M.  
1078 H. J., Till, W., Guzmán-Jacob, V., Krömer, T., Lexer, C., Paun, O., & Leroy, T. (2021).  
1079 Taxon-specific or universal? Using target capture to study the evolutionary history of  
1080 rapid radiations. *Molecular Ecology Resources*, Early View, 4 October 2021.  
1081 <https://doi.org/10.1111/1755-0998.13523>
- 1082 Yu, G., Smith, D. K., Zhu, H., Guan, Y., & Lam, T. T.-Y. (2016). GGTREE: an R package for  
1083 visualization and annotation of phylogenetic trees with their covariates and other  
1084 associated data. *Methods in Ecology and Evolution*, 8(1), 28–36.  
1085 <https://doi.org/10.1111/2041-210X.12628>
- 1086 Zhang, C., Rabiee, M., Sayyari, E., & Mirarab, S. (2018). ASTRAL-III: polynomial time species  
1087 tree reconstruction from partially resolved gene trees. *BMC Bioinformatics*, 19, 153.  
1088 <https://doi.org/10.1186/s12859-018-2129-y>
- 1089 Zhang, R., Wang, Y.-H., Jin, J.-J., Stull, G. W., Bruneau, A., Cardoso, D., de Queiroz, L. P., Moore,  
1090 M. J., Zhang, S.-D., Chen, S.-Y., Wang, J., Li, D.-Z., & Yi, T.-S. (2020). Exploration of Plastid  
1091 Phylogenomic Conflict Yields New Insights into the Deep Relationships of  
1092 Leguminosae. *Systematic Biology*, 69(4), 613–622.  
1093 <https://doi.org/10.1093/sysbio/syaa013>
- 1094 Zhuang, W., Chen, H., Yang, M., Wang, J., Pandey, M.K., Zhang, C., Chang, W.-C., Zhang, L.,  
1095 Zhang, X., Tang, R., Garg, V., Wang, X., Tang, H., Chow, C.-N., Wang, J., Deng, Y., Wang,  
1096 D., Khan, A. W., Yang, Q., Cai, T., Bajaj, P., Wu, K., ... & Varshney, R. K. (2019). The  
1097 genome of cultivated peanut provides insight into legume karyotypes, polyploid

1098 evolution and crop domestication. *Nature Genetics*, 51, 1–17.  
1099 <https://doi.org/10.1038/s41588-019-0402-2>  
1100

## 1101 **Figure Captions**

1102  
1103 **FIGURE 1** Coalescent-based phylogeny of the subfamily set ( $n = 110$ ) inferred using ASTRAL-III  
1104 on 986 gene trees. Pie charts on each node denote the fraction of gene trees that are  
1105 consistent with the shown topology (q1; blue), and with the first (q2; orange) and second (q3;  
1106 gray) alternative topologies. Local posterior probabilities are shown as color-coded circles on  
1107 each node (see inset legend). Replicate specimens are labelled with a bold 'R'. 860 gene trees  
1108 (87.22%) had missing taxa. The overall normalized quartet score was 88.82%.

1109  
1110 **FIGURE 2** Coalescent-based phylogeny of the species set ( $n = 63$ ) inferred using ASTRAL-III on  
1111 2,389 gene trees. Pie charts on each node denote the fraction of gene trees that are consistent  
1112 with the shown topology (q1; blue), and with the first (q2; orange) and second (q3; gray)  
1113 alternative topologies. Local posterior probabilities are shown as color-coded circles on each  
1114 node (see inset legend). The geographic origins of accessions from Madagascar are indicated  
1115 as bold numbers in the tree, which correspond to political regions of Madagascar, as well as  
1116 to ecological regions (see inset map). Replicate specimens are labelled with a bold 'R'. 1,014  
1117 gene trees (42.44%) had missing taxa. The overall normalized quartet score was 85.42%.

1118  
1119 **FIGURE 3** PCA and NJ tree of the population set ( $n = 51$ ) inferred from 60,204 biallelic SNPs  
1120 with no missing data. Numbers adjacent to tree branches denote sampling locations as  
1121 shown in Figure S4.  
1122

Quartet Support Local Posterior Probability

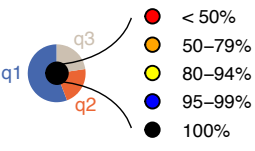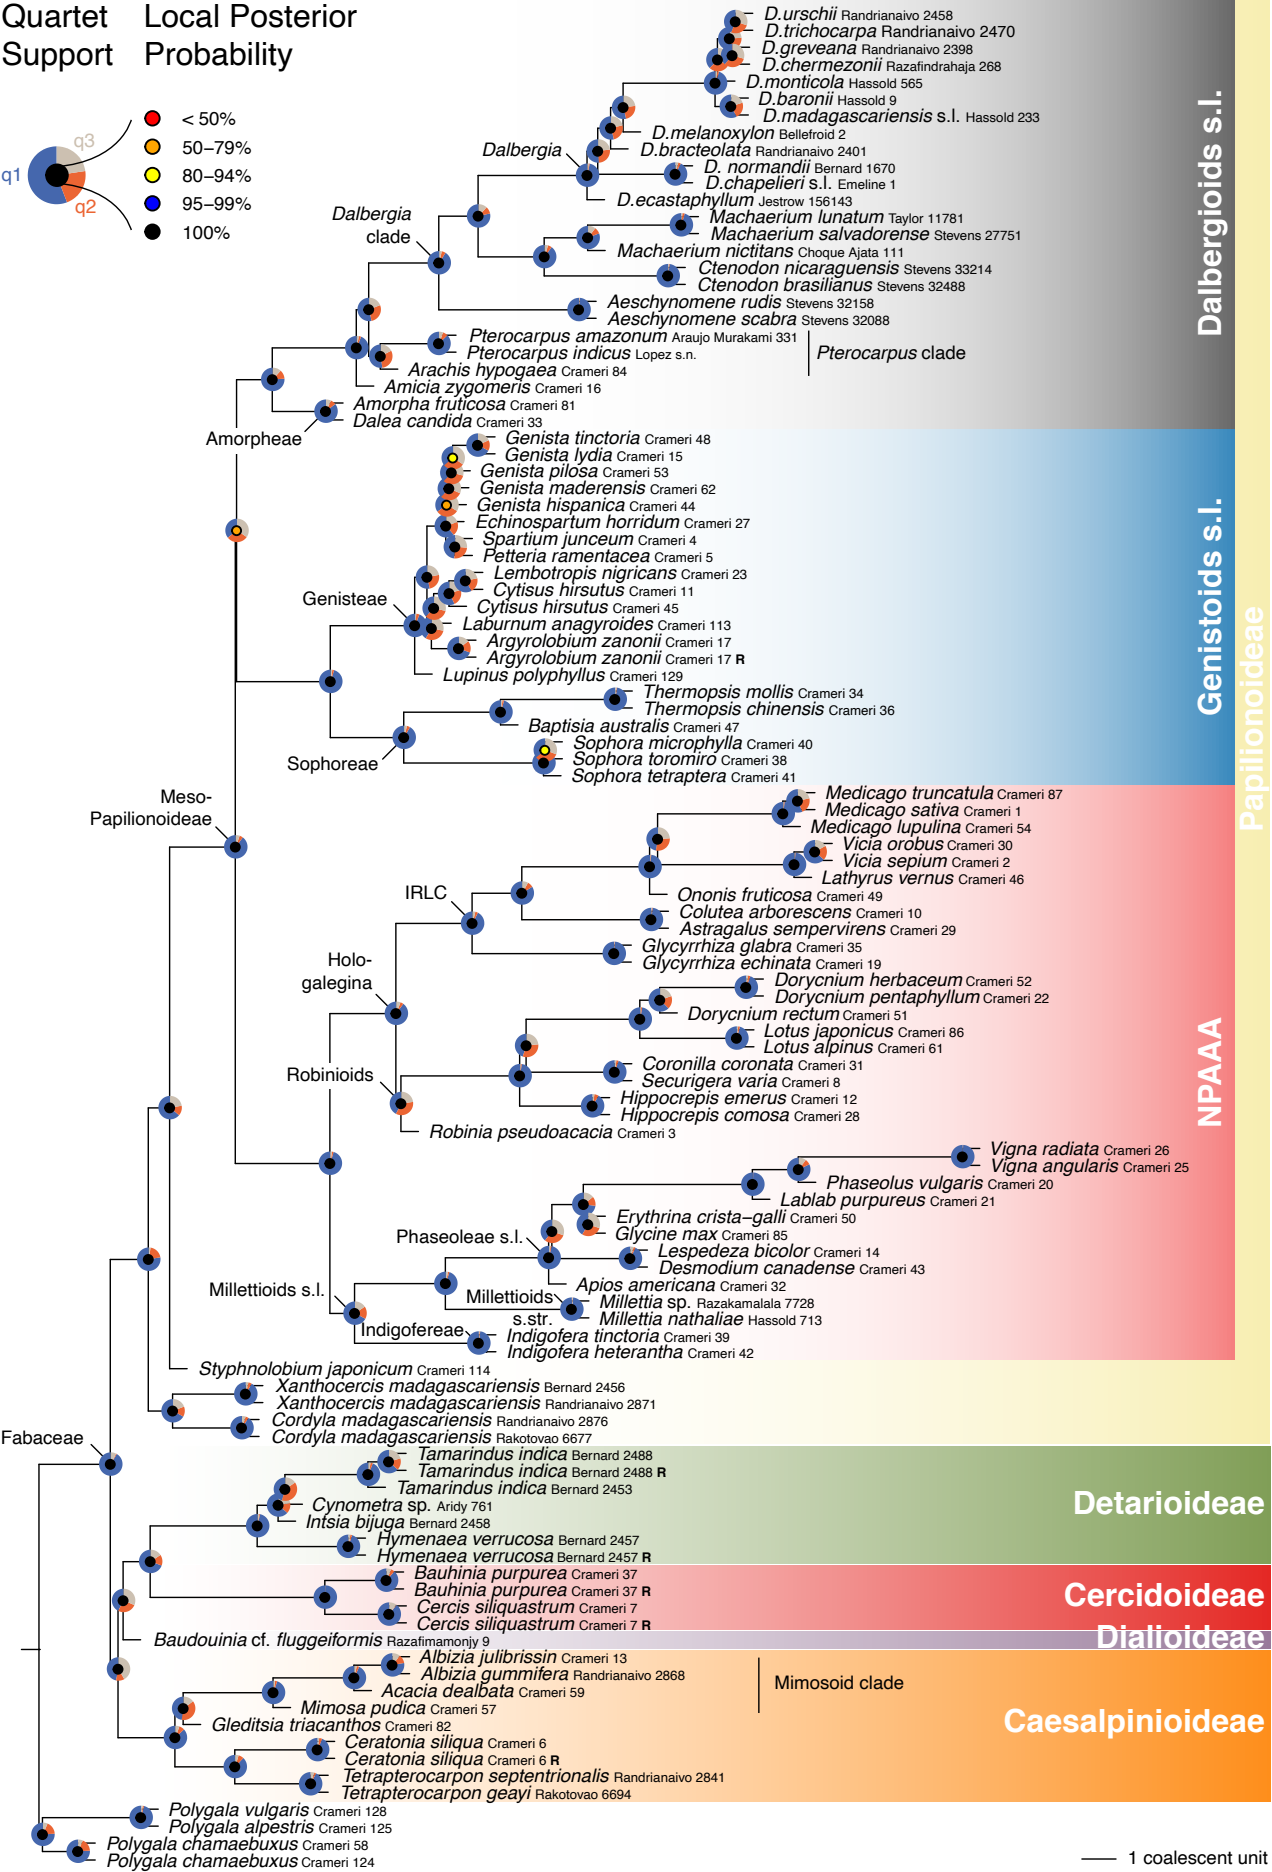

# Ecoregion

Dinerstein et al., 2017

- deciduous forests
- ericoid thickets
- humid forests
- mangroves
- spiny thickets
- subhumid forests
- succulent woodlands

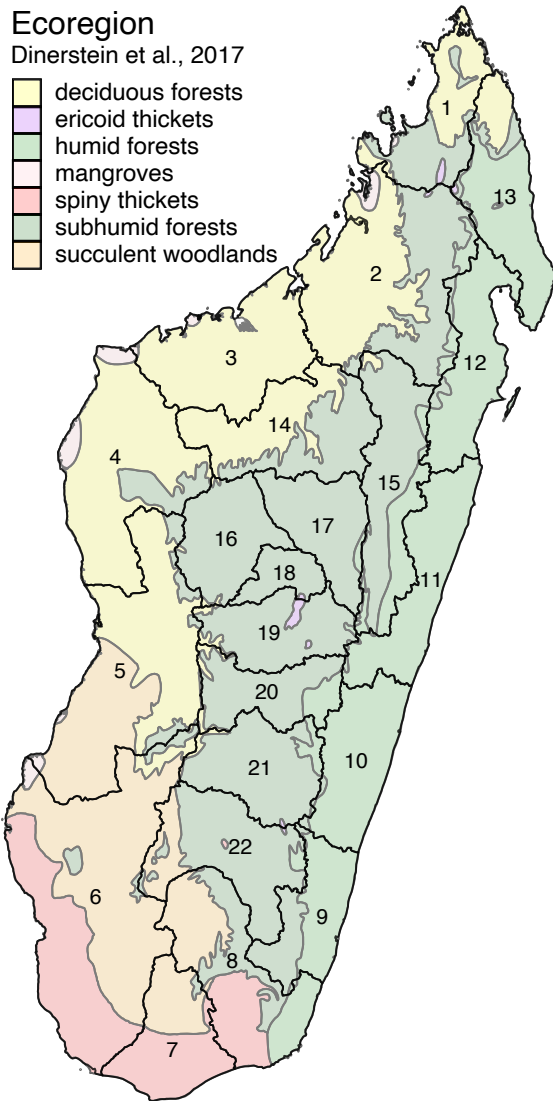

0 100 200 km

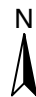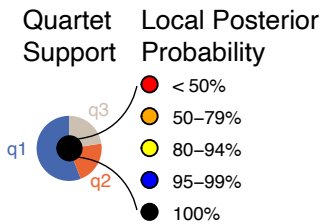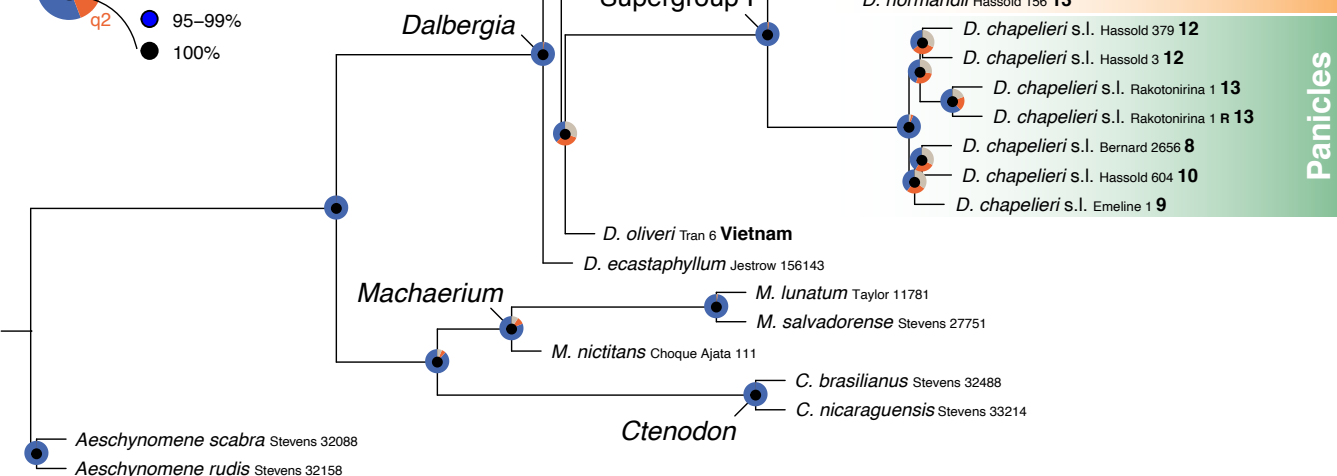

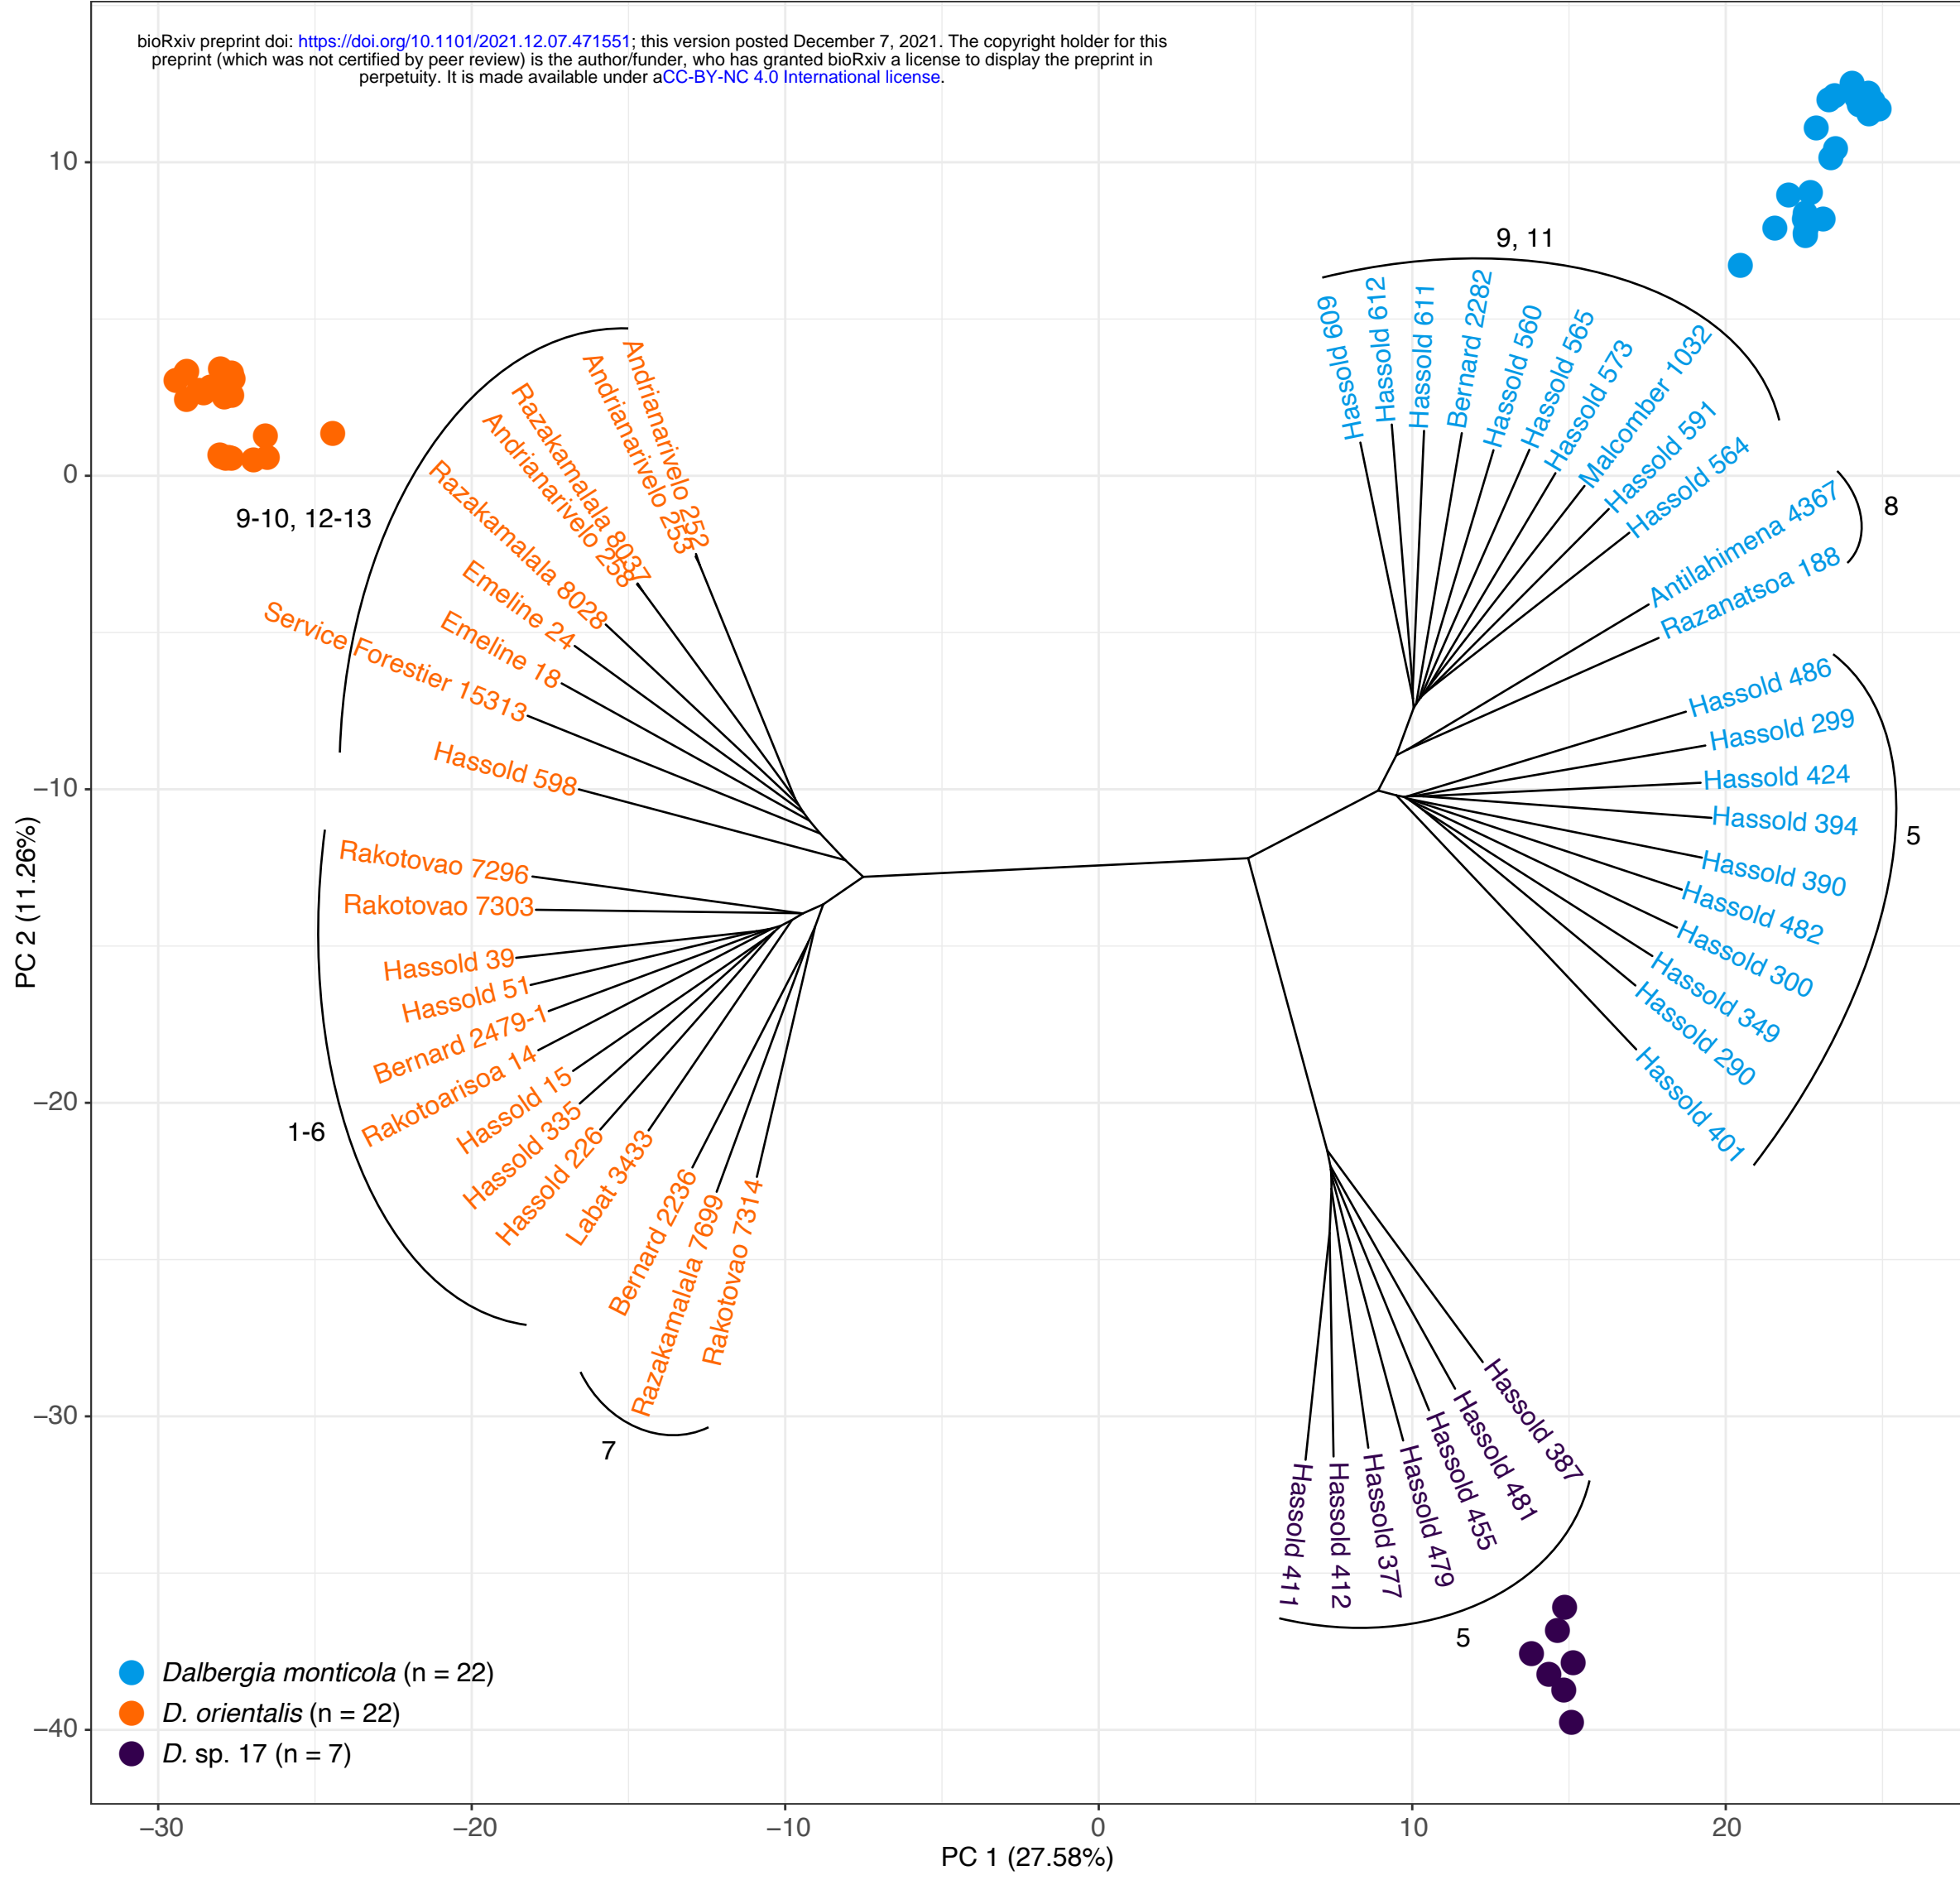

Source: http://biorxiv.org/content/10.1101/2021.12.07.471551v1.full.pdf
